# Supplementary material for: A New Mouse Model for the Study of Human Breast Cancer Metastasis
Source: PLoS One. 2012 Oct 31;7(10):e47995. doi: 10.1371/journal.pone.0047995 (PMC3485320; doi:10.1371/journal.pone.0047995)
Supplement: Table S1 — Transcripts differentially expressed (p<0.01) in MDA-MB-231 liver metastases compared to primary mammary fat pad tumor xenografts in NSG mice (total 420). (XLSX) [file pone.0047995.s001.xlsx]

## Sheet: Table S1
Summary
Experiment	Illumina Microarray
Species	Human
Analysis software	Genome Studio v2011.1
Analysis module	Gene Expression v1.9
Normalization	Quantile
Background subtraction	Yes
Error model	Illumina custom with Benjamini-Hochberg FDR correction
Content Descriptor	HumanHT-12_V4_0_R2_15002873_B.bgx
Genome build	RefSeq Rel 38
Detection pvalue filter	0.05
Differential pvalue filter	0.01
Column descriptions
ProbeID	Illumina probe identifier
GeneID	Entrez gene identifier
Symbol	Official gene symbol
Group1_Signal	Average signal for samples in Group 1
Group2_Signal	Average signal for samples in Group 2
FDR corrected DiffPval	FDR corrected pvalue for differential expression call
log2FoldChange	log2(Group2_Signal/Group1_Signal)
Regulation	Up if log2FoldChange is positive, Down if log2FoldChange is negative
Group 1	Group 2	Filter	#Up-regulated probes	#Down-regulated probes	#Total
MDA231 primary tumor	MDA231 liver mets	pvalue 0.01	223	197	420
Article title: A new mouse model for the study of human breast cancer metastasis.
Journal: PLOS ONE
Authors:Elizabeth Iorns, Katherine Drews-Elger, Toby M. Ward, Sonja Dean, Jennifer Clarke, Deborah Berry, Dorraya El Ashry and Marc Lippman
Affiliation: University of Miami Miller School of Medicine, Miami, FL, 33136, USA
Corresponding author email address: mlippman@med.miami.edu
Table S1
Transcripts differentially expressed (p<0.01) in MDA-MB-231 liver metastases compared to primary mammary fat pad tumor (total 420)
ProbeID	GeneID	Symbol	PrimaryTumor_Signal	LiverMets_Signal	FDR corrected DiffPval	log2FoldChange	Regulation
ILMN_1690921	6773	STAT2	252.279	44.2191	3.87969e-07	-2.51228	DOWN
ILMN_2390299	5696	PSMB8	198.889	36.3612	3.96182e-09	-2.45149	DOWN
ILMN_2358919	9540	TP53I3	194.774	36.3678	2.48136e-07	-2.42107	DOWN
ILMN_1651819	63917	GALNT11	182.957	35.3732	2.8828e-07	-2.37077	DOWN
ILMN_2389876	7041	TGFB1I1	202.736	40.5639	6.11169e-07	-2.32134	DOWN
ILMN_1722276	5048	PAFAH1B1	213.118	43.0382	2.29967e-05	-2.30796	DOWN
ILMN_1772286	132299	OCIAD2	207.299	42.6439	3.09783e-06	-2.2813	DOWN
ILMN_1719286	5476	CTSA	172.776	37.6155	0.00189492	-2.19951	DOWN
ILMN_2076463	121260	SLC15A4	177.259	39.2296	3.75464e-07	-2.17584	DOWN
ILMN_1695880	4015	LOX	225.315	50.1872	0.00292913	-2.16655	DOWN
ILMN_1697694	537	ATP6AP1	264.859	59.6614	8.97226e-09	-2.15035	DOWN
ILMN_1761912	4245	MGAT1	213.76	48.5621	1.90861e-10	-2.13809	DOWN
ILMN_1709486	8406	SRPX	225.533	51.3014	0.00117181	-2.13627	DOWN
ILMN_2344216	2054	STX2	185.439	42.1899	1.5108e-06	-2.13597	DOWN
ILMN_1706959	29928	TIMM22	151.499	34.5665	3.87546e-06	-2.13186	DOWN
ILMN_1741200	5993	RFX5	181.48	41.4308	5.94581e-07	-2.13104	DOWN
ILMN_1814305	54809	SAMD9	165.694	38.1234	0.00442728	-2.11977	DOWN
ILMN_1697420	26277	TINF2	160.676	37.196	1.6897e-06	-2.11094	DOWN
ILMN_1795991	51493	C22orf28	200.148	46.7126	7.65528e-06	-2.09918	DOWN
ILMN_1797728	3157	HMGCS1	394.949	92.967	6.01795e-10	-2.08687	DOWN
ILMN_1760890	57190	SEPN1	198.79	46.8237	4.87501e-07	-2.08593	DOWN
ILMN_2396996	79717	PPCS	147.849	34.8861	0.00140978	-2.0834	DOWN
ILMN_1715969	51312	SLC25A37	190.743	45.8068	0.00137358	-2.05799	DOWN
ILMN_1730999	7175	TPR	146.733	35.2643	3.17252e-05	-2.05692	DOWN
ILMN_1706553	9887	SMG7	177.271	43.0438	0.000154477	-2.04208	DOWN
ILMN_1810176	6885	MAP3K7	151.573	37.1902	2.78011e-05	-2.02702	DOWN
ILMN_1735788	11078	TRIOBP	172.79	43.6609	0.00382891	-1.9846	DOWN
ILMN_1674402	137835	TMEM71	140.521	35.7994	0.00243604	-1.97277	DOWN
ILMN_1803348	23301	EHBP1	210.664	53.8679	0.00034016	-1.96745	DOWN
ILMN_1777565	6891	TAP2	172.098	44.0111	1.39816e-05	-1.96729	DOWN
ILMN_2202481	134510	UBLCP1	167.744	43.2048	0.000285977	-1.957	DOWN
ILMN_2331636	31	ACACA	140.059	36.233	0.000683551	-1.95066	DOWN
ILMN_1753002	84932	RAB2B	293.886	76.1058	1.8294e-09	-1.94918	DOWN
ILMN_2402806	26133	TRPC4AP	147.58	38.2198	2.768e-06	-1.94911	DOWN
ILMN_1805161	8216	LZTR1	159.736	41.7608	0.000858489	-1.93547	DOWN
ILMN_1752579	535	ATP6V0A1	154.42	40.5306	2.94249e-06	-1.92978	DOWN
ILMN_1745152	55245	UQCC	218.062	57.3055	0.000609685	-1.92799	DOWN
ILMN_2415786	10225	CD96	212.9	56.0545	0.000735788	-1.92527	DOWN
ILMN_1716913	58485	TRAPPC1	173.454	45.8013	0.00012362	-1.9211	DOWN
ILMN_2175474	54516	MTRF1L	133.768	35.6423	0.000804622	-1.90807	DOWN
ILMN_1774077	2634	GBP2	414.55	110.566	2.47571e-12	-1.90664	DOWN
ILMN_2308903	140686	WFDC3	131.393	35.0703	0.000407896	-1.90557	DOWN
ILMN_1667016	11124	FAF1	132.069	35.3848	0.00123081	-1.90009	DOWN
ILMN_1734190	85012	TCEAL3	305.322	81.879	1.08033e-05	-1.89877	DOWN
ILMN_1709042	5936	RBM4	127.666	34.3197	0.000995495	-1.89527	DOWN
ILMN_1778360	5834	PYGB	373.354	100.501	1.90108e-08	-1.89334	DOWN
ILMN_1758633	81576	CCDC130	177.634	47.8554	3.58795e-06	-1.89215	DOWN
ILMN_1654690	27440	CECR5	175.702	47.408	0.000102192	-1.88993	DOWN
ILMN_1651776	29109	FHOD1	153.22	41.8536	0.00674099	-1.87218	DOWN
ILMN_1793732	10667	FARS2	128.546	35.1892	0.000525548	-1.86908	DOWN
ILMN_1756417	353322	ANKRD37	164.764	45.1728	7.46705e-05	-1.86688	DOWN
ILMN_1739001	4070	TACSTD2	232.57	63.7809	2.70967e-09	-1.86647	DOWN
ILMN_1788783	9697	TRAM2	161.692	44.8269	4.61171e-05	-1.85081	DOWN
ILMN_2333107	166	AES	171.312	47.9115	0.000618798	-1.83818	DOWN
ILMN_1801105	5580	PRKCD	148.36	41.5631	0.000381802	-1.83573	DOWN
ILMN_1695706	3021	H3F3B	190.094	53.6431	1.19779e-05	-1.82525	DOWN
ILMN_2069945	11017	SNRNP27	168.614	48.3367	0.00106462	-1.80253	DOWN
ILMN_2411794	5786	PTPRA	162.665	46.8288	0.000382591	-1.79644	DOWN
ILMN_1716446	8915	BCL10	164.489	48.0245	0.00700133	-1.77615	DOWN
ILMN_1791840	10928	RALBP1	135.012	39.5438	0.000867472	-1.77157	DOWN
ILMN_2116714	27173	SLC39A1	161.726	47.5225	0.00127212	-1.76686	DOWN
ILMN_2384544	8751	ADAM15	141.61	41.629	0.000164202	-1.76626	DOWN
ILMN_1730294	125476	INO80C	159.368	46.8704	0.000947569	-1.76561	DOWN
ILMN_1802027	4258	MGST2	182.968	53.9619	2.58654e-07	-1.76158	DOWN
ILMN_2146372	200845	KCTD6	121.142	35.9053	0.00461127	-1.75443	DOWN
ILMN_1720708	1453	CSNK1D	164.054	48.8332	0.00155499	-1.74824	DOWN
ILMN_1712305	79901	CYBRD1	200.966	60.5562	1.78751e-07	-1.73061	DOWN
ILMN_1651705	847	CAT	165.85	50.1868	0.000112732	-1.7245	DOWN
ILMN_3237241	26017	FAM32A	140.616	42.6097	0.00198502	-1.72251	DOWN
ILMN_1803277	9961	MVP	188.126	57.1072	0.000274805	-1.71996	DOWN
ILMN_1679134	54780	NSMCE4A	149.983	45.6831	0.00283865	-1.71506	DOWN
ILMN_1676026	64949	MRPS26	148.273	45.6173	0.00345009	-1.7006	DOWN
ILMN_1748018	26003	GORASP2	149.961	46.1801	4.6852e-05	-1.69924	DOWN
ILMN_2055165	93621	MRFAP1	656.02	202.533	8.22853e-08	-1.69558	DOWN
ILMN_1766762	83658	DYNLRB1	170.451	52.7191	0.00150383	-1.69296	DOWN
ILMN_1772316	23353	UNC84A	160.898	49.8263	4.61171e-05	-1.69116	DOWN
ILMN_1666192	84516	DCTN5	180.31	55.8418	8.59355e-07	-1.69107	DOWN
ILMN_1718132	1892	ECHS1	244.247	75.6689	1.40336e-05	-1.69057	DOWN
ILMN_1671932	25813	SAMM50	144.746	45.498	0.000398775	-1.66965	DOWN
ILMN_1671554	23175	LPIN1	434.924	136.932	4.24899e-07	-1.66731	DOWN
ILMN_1655710	642989	LOC642989	677.752	214.229	1.53769e-08	-1.6616	DOWN
ILMN_1800602	25801	GCA	153.236	48.5208	0.003205	-1.65908	DOWN
ILMN_1758915	5134	PDCD2	172.526	54.6591	0.00470753	-1.65828	DOWN
ILMN_1753885	54915	YTHDF1	246.857	78.3722	3.58095e-05	-1.65526	DOWN
ILMN_1790909	4780	NFE2L2	179.907	57.3938	1.76139e-06	-1.64829	DOWN
ILMN_1676358	5899	RALB	217.649	69.6041	6.25156e-08	-1.64476	DOWN
ILMN_1660749	79058	ASPSCR1	212.285	68.307	0.000130698	-1.63589	DOWN
ILMN_1685005	7132	TNFRSF1A	284.031	91.8931	1.12682e-05	-1.62802	DOWN
ILMN_1800164	8500	PPFIA1	160.913	52.2516	0.000917562	-1.62273	DOWN
ILMN_1687768	135112	NCOA7	122.068	39.76	0.00137919	-1.61829	DOWN
ILMN_1733603	4717	NDUFC1	170.645	56.3025	0.00710435	-1.59972	DOWN
ILMN_2389582	3191	HNRNPL	195.343	64.6591	0.00137171	-1.59508	DOWN
ILMN_2329914	10252	SPRY1	190.914	63.1939	0.00139519	-1.59507	DOWN
ILMN_1674394	57136	C20orf3	135.574	45.0154	0.00167273	-1.59059	DOWN
ILMN_2041190	2150	F2RL1	525.358	174.544	0.00244508	-1.58971	DOWN
ILMN_1681890	6990	DYNLT3	160.926	53.6386	0.00296336	-1.58505	DOWN
ILMN_1690524	6845	VAMP7	189.135	63.4695	0.00176865	-1.57528	DOWN
ILMN_1714167	1528	CYB5A	181.331	60.8524	3.47224e-05	-1.57524	DOWN
ILMN_2248589	79665	DHX40	174.248	58.5102	0.000236234	-1.57438	DOWN
ILMN_1705464	64975	MRPL41	234.748	78.8476	3.21936e-05	-1.57397	DOWN
ILMN_1657423	51324	SPG21	123.59	41.5935	0.00420756	-1.57114	DOWN
ILMN_2072091	221092	HNRNPUL2	142.841	48.2403	0.00111536	-1.5661	DOWN
ILMN_1718610	55114	ARHGAP17	139.005	46.9928	0.00223895	-1.56462	DOWN
ILMN_1785179	7327	UBE2G2	169.768	57.7459	1.87126e-05	-1.55577	DOWN
ILMN_1814247	10732	TCFL5	225.58	77.2645	0.000316713	-1.54576	DOWN
ILMN_1769520	9246	UBE2L6	331.737	113.695	0.000632924	-1.54487	DOWN
ILMN_3235221	644936	LOC644936	579.779	200.302	3.66469e-05	-1.53333	DOWN
ILMN_1682165	22978	NT5C2	186.394	64.4481	0.00165702	-1.53215	DOWN
ILMN_1739450	4779	NFE2L1	142.507	49.3777	0.000246338	-1.5291	DOWN
ILMN_1778347	318	NUDT2	182.03	63.0893	0.000999419	-1.52871	DOWN
ILMN_2405628	116447	TOP1MT	149.381	51.9007	0.000141304	-1.52517	DOWN
ILMN_1749345	6811	STX5	195.904	68.3149	8.72192e-05	-1.51987	DOWN
ILMN_1665831	1209	CLPTM1	148.682	51.8688	0.000372819	-1.51929	DOWN
ILMN_2402805	26133	TRPC4AP	208.201	72.7354	0.00223895	-1.51725	DOWN
ILMN_2147517	965	CD58	356.906	126.378	0.00246635	-1.4978	DOWN
ILMN_2209180	55197	P15RS	189.468	67.3158	0.00293379	-1.49294	DOWN
ILMN_2345015	80142	PTGES2	106.345	37.887	0.00974985	-1.48898	DOWN
ILMN_1803476	222658	KCTD20	177.81	63.5438	0.00117495	-1.48451	DOWN
ILMN_1788778	55752	SEPT11	135.315	48.3824	0.00328095	-1.48377	DOWN
ILMN_2086105	81848	SPRY4	386.027	138.071	1.65477e-05	-1.48329	DOWN
ILMN_1723971	2030	SLC29A1	114.779	41.1746	0.00507893	-1.47904	DOWN
ILMN_1729533	128240	APOA1BP	243.959	87.5983	0.00419113	-1.47766	DOWN
ILMN_1771019	9110	MTMR4	136.082	49.9417	0.00324337	-1.44616	DOWN
ILMN_1678729	64374	SIL1	137.5	50.7517	0.00655507	-1.43791	DOWN
ILMN_2313158	4154	MBNL1	236.968	88.1791	0.00203825	-1.42618	DOWN
ILMN_1811468	79191	IRX3	151.827	56.9125	0.00262343	-1.41561	DOWN
ILMN_1657797	9158	FIBP	209.819	79.5315	9.09155e-06	-1.39955	DOWN
ILMN_1755974	230	ALDOC	361.687	137.707	0.00443165	-1.39314	DOWN
ILMN_2144088	2222	FDFT1	476.754	182.531	8.09864e-07	-1.3851	DOWN
ILMN_1687247	64847	SPATA20	158.97	62.7951	0.000786997	-1.34003	DOWN
ILMN_1672662	6574	SLC20A1	1418.22	569.269	4.97841e-08	-1.3169	DOWN
ILMN_1809477	23589	CARHSP1	250.846	100.892	5.33806e-06	-1.31398	DOWN
ILMN_2370624	1305	COL13A1	370.647	149.398	0.000249415	-1.31088	DOWN
ILMN_1713934	9516	LITAF	205.146	82.8161	5.46432e-05	-1.30867	DOWN
ILMN_1800451	10025	MED16	201.463	81.6268	7.36669e-05	-1.3034	DOWN
ILMN_1737462	55074	OXR1	210.275	85.2824	0.00131925	-1.30196	DOWN
ILMN_2363106	55147	RBM23	206.146	84.2588	0.000840364	-1.29077	DOWN
ILMN_1795911	9652	TTC37	229.468	94.1553	3.43461e-05	-1.28518	DOWN
ILMN_1765459	6284	S100A13	458.786	189.274	0.00632705	-1.27734	DOWN
ILMN_2038777	60	ACTB	5216.93	2172.53	0.000152165	-1.26383	DOWN
ILMN_1795342	79083	MLPH	205.241	85.7191	0.00448416	-1.25963	DOWN
ILMN_1728305	23369	PUM2	215.017	89.9027	0.00720322	-1.25802	DOWN
ILMN_3303612	80336	PABPC1L	135.931	57.0335	0.00669322	-1.253	DOWN
ILMN_2359789	5879	RAC1	1127.52	475.648	4.91343e-07	-1.24518	DOWN
ILMN_1752582	5869	RAB5B	281.562	119.259	0.00495468	-1.23936	DOWN
ILMN_2121408	1839	HBEGF	465.977	198.625	0.000696275	-1.23021	DOWN
ILMN_1670379	84168	ANTXR1	272.935	116.49	0.00268279	-1.22835	DOWN
ILMN_3250585	22993	KIAA0194	161.616	69.027	0.00276804	-1.22734	DOWN
ILMN_1814726	950	SCARB2	464.719	200.066	3.75464e-07	-1.21588	DOWN
ILMN_1779735	389541	C7orf59	304.913	133.124	0.00055217	-1.19563	DOWN
ILMN_1682717	8870	IER3	539.657	237.817	0.00354104	-1.18219	DOWN
ILMN_1651799	54407	SLC38A2	325.362	143.581	0.00577186	-1.18019	DOWN
ILMN_2050023	374969	CCDC23	178.965	79.9931	0.00161443	-1.16173	DOWN
ILMN_1793474	3638	INSIG1	232.965	104.237	0.000929483	-1.16025	DOWN
ILMN_2041577	79581	GPR172A	170.059	76.2255	0.00382891	-1.15769	DOWN
ILMN_1748650	84311	MRPL45	201.683	91.5394	0.00146281	-1.13963	DOWN
ILMN_1758941	7905	REEP5	524.576	238.58	1.45596e-06	-1.13668	DOWN
ILMN_1775708	6515	SLC2A3	693.659	317.816	0.00942849	-1.12604	DOWN
ILMN_3241469	100134537	LOC100134537	317.017	148.313	0.00367672	-1.09591	DOWN
ILMN_1669015	7511	XPNPEP1	196.309	91.8911	0.00193273	-1.09513	DOWN
ILMN_2075927	83931	STK40	212.163	99.5233	0.00281137	-1.09207	DOWN
ILMN_1668721	896	CCND3	226.346	106.188	0.00775689	-1.09191	DOWN
ILMN_2057573	57488	FAM62B	765.062	368.674	0.00345389	-1.05323	DOWN
ILMN_1813275	56940	DUSP22	224.533	108.236	0.00591248	-1.05274	DOWN
ILMN_3245517	100134273	LOC100134273	1369.62	662.279	0.00322341	-1.04827	DOWN
ILMN_3258795	51306	FAM13B	243	117.919	0.00691292	-1.04316	DOWN
ILMN_3266944	100129599	LOC100129599	1292.7	627.913	2.46241e-05	-1.04175	DOWN
ILMN_1711566	7076	TIMP1	916.297	447.467	5.33806e-06	-1.03403	DOWN
ILMN_1815012	23265	EXOC7	316.229	154.558	0.000294861	-1.03282	DOWN
ILMN_2128668	22887	FOXJ3	238.218	116.928	0.00322396	-1.02666	DOWN
ILMN_2354391	112398	EGLN2	213.343	104.824	0.00420756	-1.02521	DOWN
ILMN_2301624	23499	MACF1	218.846	108.782	0.00322396	-1.00847	DOWN
ILMN_1761159	23344	ESYT1	493.429	245.624	0.000267498	-1.00639	DOWN
ILMN_2130441	3136	HLA-H	701.177	351.124	0.00106462	-0.997798	DOWN
ILMN_2142554	29937	NENF	296.437	148.981	0.00145759	-0.992596	DOWN
ILMN_2415235	1454	CSNK1E	496.592	250.644	0.000117874	-0.986418	DOWN
ILMN_1692545	646849	LOC646849	976.842	493.361	0.00205732	-0.985482	DOWN
ILMN_2192032	6728	SRP19	270.302	136.677	0.00160484	-0.983807	DOWN
ILMN_2079803	26065	LSM14A	232.912	118.358	0.00364835	-0.976629	DOWN
ILMN_1784602	1026	CDKN1A	323.653	164.903	0.00159879	-0.972829	DOWN
ILMN_1658351	51024	FIS1	204.768	104.828	0.00968893	-0.965965	DOWN
ILMN_1677440	10159	ATP6AP2	307.136	157.33	0.00255086	-0.965085	DOWN
ILMN_1709809	4809	NHP2L1	337.905	173.169	0.00179452	-0.964433	DOWN
ILMN_2349658	706	TSPO	480.733	247.547	0.000262096	-0.957531	DOWN
ILMN_1723978	3956	LGALS1	6735.93	3482.67	0.00467259	-0.951683	DOWN
ILMN_1690610	22913	RALY	248.404	129.817	0.00482003	-0.936207	DOWN
ILMN_2395728	11100	HNRPUL1	352.958	184.543	0.00398945	-0.935536	DOWN
ILMN_1685824	9334	B4GALT5	359.343	188.058	0.00499991	-0.934185	DOWN
ILMN_1724139	114908	TMEM123	693.399	365.663	0.000519356	-0.923172	DOWN
ILMN_3242540	283316	CD163L1	306.745	169.802	0.00941564	-0.853189	DOWN
ILMN_1715569	51019	CCDC53	369.856	206.363	0.00657784	-0.841777	DOWN
ILMN_1661917	644039	LOC644039	4942.08	2781.06	0.00786232	-0.829484	DOWN
ILMN_1660021	10226	M6PRBP1	1226.34	693.72	0.00200837	-0.821931	DOWN
ILMN_2203950	3105	HLA-A	2894.14	1639.89	0.00102307	-0.819532	DOWN
ILMN_2311548	51651	PTRH2	367.487	208.885	0.00894922	-0.814987	DOWN
ILMN_2230902	1495	CTNNA1	674.556	394.747	0.00619198	-0.773011	DOWN
ILMN_1801616	2012	EMP1	1396.87	820.654	0.0073683	-0.76735	DOWN
ILMN_2345837	1211	CLTA	507.637	1296.85	0.00959085	1.35314	UP
ILMN_3308335	26827	RNU6-1	889.672	2379.22	0.00761396	1.41914	UP
ILMN_1810214	3727	JUND	1603.24	4423.65	0.0047549	1.46425	UP
ILMN_3310351	100302741	RNU6-15	903.378	2499.6	0.00577674	1.46829	UP
ILMN_2148847	55122	AKIRIN2	190.281	529.598	0.00789338	1.47676	UP
ILMN_1728047	10327	AKR1A1	183.783	513.102	0.00792983	1.48124	UP
ILMN_1740429	2512	FTL	3249.55	9107.7	0.00383234	1.48685	UP
ILMN_2366391	5052	PRDX1	1489.89	4188.88	0.00445272	1.49135	UP
ILMN_1778177	7756	ZNF207	313.954	898.717	0.0047417	1.51731	UP
ILMN_1762899	1958	EGR1	299.804	862.379	0.00669322	1.5243	UP
ILMN_3274596	286512	LOC286512	607.703	1750.85	0.00655507	1.52661	UP
ILMN_1738326	9470	EIF4E2	177.686	513.996	0.00664797	1.53243	UP
ILMN_1793598	51074	APIP	140.213	407.913	0.00800438	1.54065	UP
ILMN_3249618	100133477	LOC100133477	535.589	1561.34	0.00376417	1.54358	UP
ILMN_1812638	10632	ATP5L	1596.33	4700.33	0.00302735	1.558	UP
ILMN_1744649	5693	PSMB5	596.814	1757.82	0.00392488	1.55844	UP
ILMN_1808587	463	ZFHX3	142.368	422.233	0.00649134	1.56841	UP
ILMN_2191428	7314	UBB	3583.14	10637.9	0.00302789	1.56991	UP
ILMN_1695763	10954	PDIA5	98.6735	299.724	0.00897309	1.6029	UP
ILMN_1655316	5706	PSMC6	545.686	1658.91	0.00310363	1.60409	UP
ILMN_1713482	51503	CWC15	280.103	852.141	0.0037326	1.60514	UP
ILMN_1726743	10884	MRPS30	266.454	817.432	0.00325231	1.61721	UP
ILMN_2383693	26019	UPF2	195.858	601.122	0.00377755	1.61785	UP
ILMN_1800837	10428	CFDP1	227.127	697.802	0.00360609	1.61932	UP
ILMN_1789136	10169	SERF2	504.272	1559.74	0.00229889	1.62903	UP
ILMN_1708728	55766	H2AFJ	373.119	1154.77	0.00361552	1.6299	UP
ILMN_1769319	7555	CNBP	742.403	2301.84	0.0020755	1.63251	UP
ILMN_1774661	6628	SNRPB	701.17	2190.8	0.00220718	1.64362	UP
ILMN_2378868	6430	SFRS5	351.663	1099.22	0.00239928	1.64421	UP
ILMN_1715273	8301	PICALM	250.356	796.963	0.00285222	1.67053	UP
ILMN_1773154	4792	NFKBIA	708.761	2257.52	0.00201541	1.67137	UP
ILMN_2096116	7184	HSP90B1	1381.15	4404.38	0.00172181	1.67307	UP
ILMN_1667257	6390	SDHB	615.58	1987.59	0.00163981	1.691	UP
ILMN_1652128	55788	LMBRD1	177.075	581.364	0.003205	1.71508	UP
ILMN_1754121	1445	CSK	175.989	583.804	0.00315478	1.73	UP
ILMN_1784299	79002	C19orf43	263.607	882.462	0.00170501	1.74314	UP
ILMN_1691575	6643	SNX2	207.82	696.711	0.0023217	1.74523	UP
ILMN_3188110	55049	C19orf60	236.9	802.182	0.00167273	1.75965	UP
ILMN_1739770	9443	CRSP9	80.3286	274.442	0.00543926	1.77252	UP
ILMN_1791702	6595	SMARCA2	233.155	799.832	0.00196128	1.7784	UP
ILMN_2340721	80194	TMEM134	67.6476	232.505	0.00739609	1.78115	UP
ILMN_1654552	10240	MRPS31	127.467	439.601	0.00249181	1.78607	UP
ILMN_1659405	653773	LOC653773	1889.3	6604.03	0.0013323	1.8055	UP
ILMN_3238680	154791	C7orf55	108.924	383.172	0.00307742	1.81467	UP
ILMN_1778991	4781	NFIB	276.94	975.03	0.00120968	1.81587	UP
ILMN_2365549	7862	BRPF1	327.75	1155.24	0.00110084	1.81753	UP
ILMN_1772677	4850	CNOT4	73.2306	258.224	0.00578297	1.8181	UP
ILMN_1714327	9739	SETD1A	92.6763	329.643	0.00352169	1.83063	UP
ILMN_1655884	488	ATP2A2	210.223	754.257	0.00161443	1.84314	UP
ILMN_1765060	55030	FBXO34	85.3799	308.088	0.00387098	1.85137	UP
ILMN_1723843	1459	CSNK2A2	75.429	274.441	0.0047549	1.8633	UP
ILMN_1656913	4190	MDH1	1158.39	4222.54	0.000823649	1.86599	UP
ILMN_1780887	27005	USP21	60.3483	220.708	0.00649569	1.87075	UP
ILMN_2181540	7528	YY1	103.891	382.956	0.00474518	1.88211	UP
ILMN_2222234	10549	PRDX4	782.653	2893.33	0.000752147	1.88629	UP
ILMN_1725620	79893	GGNBP2	175.327	649.098	0.00114624	1.88839	UP
ILMN_3206343	644914	LOC644914	574.589	2137.73	0.000719615	1.89547	UP
ILMN_2371379	47	ACLY	752.573	2807.08	0.000667119	1.89916	UP
ILMN_3200717	643387	LOC643387	71.4195	267.16	0.00618023	1.90331	UP
ILMN_3247261	9693	RAPGEF2	111.257	416.231	0.00170736	1.90348	UP
ILMN_1804396	64207	C14orf4	238.971	896.476	0.000900161	1.90743	UP
ILMN_1703427	6651	SON	58.5189	220.571	0.00544206	1.91427	UP
ILMN_1655194	79960	PHF17	52.2421	198.329	0.00691663	1.92461	UP
ILMN_1751627	27095	TRAPPC3	156.184	594.88	0.00105011	1.92935	UP
ILMN_1700695	23446	SLC44A1	224.143	856.224	0.000785439	1.93357	UP
ILMN_2324002	800	CALD1	92.3404	353.464	0.00202109	1.93653	UP
ILMN_1696946	654174	LOC654174	49.3871	189.952	0.00738419	1.94342	UP
ILMN_1687887	5704	PSMC4	78.9682	307.238	0.00225419	1.96001	UP
ILMN_1659753	3920	LAMP2	146.101	571.495	0.000999419	1.96777	UP
ILMN_2395389	5704	PSMC4	128.925	504.838	0.00106401	1.96929	UP
ILMN_1812769	51035	UBXN1	358.651	1408.59	0.000584867	1.9736	UP
ILMN_1762766	5786	PTPRA	62.6405	249.347	0.00315711	1.99299	UP
ILMN_1666713	10434	LYPLA1	56.0301	223.529	0.00410049	1.99619	UP
ILMN_1737164	10548	TM9SF1	54.8865	219.248	0.00428081	1.99804	UP
ILMN_1784780	23152	CIC	59.4592	239.264	0.00330498	2.00863	UP
ILMN_3199737	727865	LOC727865	349.274	1405.53	0.000718309	2.00868	UP
ILMN_1709334	10548	TM9SF1	127.236	512.604	0.000901172	2.01034	UP
ILMN_1784655	116238	TLCD1	55.4866	226.572	0.00373256	2.02976	UP
ILMN_2320853	7323	UBE2D3	853.755	3491.3	0.000393831	2.03187	UP
ILMN_1738529	617	BCS1L	39.8223	163.882	0.00959085	2.04101	UP
ILMN_1718303	5819	PVRL2	76.5141	315.214	0.00237637	2.04253	UP
ILMN_1671291	8668	EIF3I	669.101	2761.43	0.000328563	2.04512	UP
ILMN_1863939			57.3197	237.666	0.00309205	2.05183	UP
ILMN_1753925	645609	LOC645609	45.2765	189.903	0.00519146	2.06843	UP
ILMN_1744508	51307	FAM53C	85.9145	363.363	0.00112538	2.08044	UP
ILMN_1662719	60313	GPBP1L1	41.3875	175.548	0.00637601	2.0846	UP
ILMN_1680626	10130	PDIA6	183.077	777.19	0.00045496	2.08582	UP
ILMN_1719606	644762	LOC644762	55.8029	240.615	0.00240385	2.10831	UP
ILMN_1769250	84364	ARFGAP2	39.2288	172.769	0.00619198	2.13886	UP
ILMN_1702487	6446	SGK	193.22	853.903	0.000354196	2.14383	UP
ILMN_1735353	79192	IRX1	40.9271	180.944	0.00490797	2.14442	UP
ILMN_1783120	7871	SLMAP	172.636	764.712	0.000370882	2.14719	UP
ILMN_1723020	4214	MAP3K1	60.7685	269.242	0.00163981	2.14751	UP
ILMN_1808860	6811	STX5	85.2872	378.558	0.000836294	2.15011	UP
ILMN_1800308	2968	GTF2H4	64.6171	287.018	0.0014115	2.15115	UP
ILMN_1783684	648695	LOC648695	166.412	745.116	0.000354598	2.16271	UP
ILMN_1901419			41.1541	185.551	0.0063561	2.17271	UP
ILMN_1803597	2267	FGL1	34.4755	157.225	0.00706506	2.18919	UP
ILMN_1775522	9500	MAGED1	159.577	728.586	0.00032752	2.19084	UP
ILMN_1660923	54435	HCG4	238.099	1106.21	0.000229287	2.21599	UP
ILMN_1880406			459.385	2140.37	0.00017888	2.22008	UP
ILMN_1655137	23318	ZCCHC11	51.5878	241.487	0.00169994	2.22684	UP
ILMN_1778121	83698	CALN1	39.0764	185.34	0.00352228	2.24581	UP
ILMN_1734544	9589	WTAP	65.1926	309.634	0.000898554	2.24778	UP
ILMN_3178792	3181	HNRNPA2B1	340.845	1627.64	0.000173162	2.2556	UP
ILMN_1692916	646135	LOC646135	39.2548	191.683	0.00285704	2.28778	UP
ILMN_1687958	79751	SLC25A22	47.2283	232.14	0.00163441	2.29727	UP
ILMN_1744244	1798	DPAGT1	34.9244	172.879	0.00384794	2.30746	UP
ILMN_1790461	84300	C6orf125	262.997	1307.69	0.000152165	2.3139	UP
ILMN_2358980	3611	ILK	74.7537	372.828	0.000696275	2.31829	UP
ILMN_1703335	114294	LACTB	67.3605	336.196	0.000615473	2.31933	UP
ILMN_1761996	6430	SFRS5	380.817	1904.47	0.000127373	2.32222	UP
ILMN_1672004	10140	TOB1	36.6038	184.126	0.00330283	2.33063	UP
ILMN_1762439	91304	C19orf6	36.809	186.16	0.00285222	2.33841	UP
ILMN_2282077	142678	MIB2	46.6476	237.521	0.0013323	2.34818	UP
ILMN_2129927	2131	EXT1	80.5269	410.526	0.000379562	2.34993	UP
ILMN_1720799	9524	TECR	508	2640.56	9.90606e-05	2.37794	UP
ILMN_1735402	8816	WDR22	43.8376	228.484	0.00133673	2.38185	UP
ILMN_2143822	7707	ZNF148	76.4522	398.654	0.000403396	2.38251	UP
ILMN_1693014	1051	CEBPB	516.782	2701.2	9.22643e-05	2.38597	UP
ILMN_1700733	56204	KIAA1370	40.6613	212.882	0.00162094	2.38832	UP
ILMN_1668469	23240	KIAA0922	34.954	185.466	0.00238869	2.40762	UP
ILMN_1686516	10658	CUGBP1	32.9555	176.558	0.00289215	2.42155	UP
ILMN_2331205	1120	CHKB	67.324	365.031	0.000360504	2.43882	UP
ILMN_3307729	51523	CXXC5	70.1986	380.848	0.000333827	2.4397	UP
ILMN_1691393	23549	DNPEP	68.0369	369.252	0.000372819	2.44022	UP
ILMN_1739641	8897	MTMR3	136.976	746.453	0.000136112	2.44613	UP
ILMN_1776105	5723	PSPH	45.4043	250.152	0.000836294	2.4619	UP
ILMN_3226613	729686	LOC729686	238.884	1320.59	0.000102846	2.4668	UP
ILMN_1800952	5717	PSMD11	41.8102	232.213	0.00117495	2.47352	UP
ILMN_1754421	51103	NDUFAF1	47.8335	268.407	0.000644671	2.48833	UP
ILMN_1736847	112950	MED8	59.4086	333.381	0.000410729	2.48843	UP
ILMN_1710598	6497	SKI	25.7281	145.039	0.00655507	2.49503	UP
ILMN_1886493			141.801	808.142	0.000102846	2.51075	UP
ILMN_1740170	400916	CHCHD10	418.681	2387.92	9.21266e-05	2.51183	UP
ILMN_1802706	3421	IDH3G	94.6263	540.281	0.000156491	2.5134	UP
ILMN_1807833	81502	HM13	73.6476	421.826	0.000234242	2.51794	UP
ILMN_1749834	388588	LOC388588	22.4838	129.635	0.00755334	2.5275	UP
ILMN_2231911	549	AUH	26.0299	154.941	0.00330498	2.57348	UP
ILMN_1860084			85.9487	515.056	0.000172575	2.58318	UP
ILMN_1733419	898	CCNE1	19.8929	120.564	0.00941564	2.59947	UP
ILMN_1735579	94115	CGB8	23.299	142.309	0.00442326	2.61068	UP
ILMN_1746148	375387	LRRC33	35.0223	216.849	0.000903778	2.63035	UP
ILMN_1860753			34.3339	212.749	0.000918405	2.63145	UP
ILMN_1686920	131076	CCDC58	51.656	330.696	0.000237398	2.6785	UP
ILMN_1795251	8404	SPARCL1	39.3058	256.381	0.00044243	2.70548	UP
ILMN_1721093	6881	TAF10	165.669	1087.53	4.61171e-05	2.71468	UP
ILMN_2217329	285148	IAH1	284.335	1888.8	3.33445e-05	2.73181	UP
ILMN_1674050	1296	COL8A2	34.0379	226.495	0.00060408	2.73426	UP
ILMN_2375484	132864	CPEB2	45.6525	305.552	0.000251709	2.74265	UP
ILMN_1826531			134.273	917.442	4.37983e-05	2.77244	UP
ILMN_2313856	114883	OSBPL9	65.0027	452.224	9.41278e-05	2.79846	UP
ILMN_3237507	552889	LOC552889	122.058	857.002	4.20892e-05	2.81173	UP
ILMN_1689114	6436	SFTPA2B	18.6912	131.435	0.00448416	2.81391	UP
ILMN_1729175	26273	FBXO3	48.0602	340.623	0.000183871	2.82526	UP
ILMN_3290019	646753	LOC646753	226.756	1668.53	2.40227e-05	2.87936	UP
ILMN_1694799	9063	PIAS2	55.7085	410.119	9.4355e-05	2.88007	UP
ILMN_1792473	199	AIF1	83.3543	617.445	5.68246e-05	2.88898	UP
ILMN_3219631	647081	LOC647081	27.7286	206.155	0.000609706	2.89428	UP
ILMN_1762977	441436	LOC441436	15.8228	117.896	0.00661909	2.89744	UP
ILMN_1704385	347376	LOC347376	103.918	795.491	3.51994e-05	2.9364	UP
ILMN_1753524	8335	HIST1H2AB	17.9802	142.088	0.00247639	2.9823	UP
ILMN_1727813	25874	BRP44	94.1634	744.966	3.02206e-05	2.98394	UP
ILMN_1652888	51236	C8orf30A	14.8331	118.02	0.00664797	2.99214	UP
ILMN_1712975	10897	YIF1A	139.798	1125.3	2.26591e-05	3.0089	UP
ILMN_1848552			174.652	1408.46	1.87126e-05	3.01156	UP
ILMN_2374244	8445	DYRK2	44.1641	356.257	9.4355e-05	3.01197	UP
ILMN_1655311	145853	LOC145853	66.6189	540.921	0.000244151	3.02141	UP
ILMN_1785037	6746	SSR2	34.2704	284.102	0.000156474	3.05138	UP
ILMN_1718924	2108	ETFA	588.235	4955.65	1.22532e-05	3.07461	UP
ILMN_1779710	9366	RAB9P1	14.352	121.01	0.00550223	3.07581	UP
ILMN_1705702	645946	LOC645946	13.5039	115.835	0.00751172	3.10063	UP
ILMN_1779751	154791	C7orf55	29.7974	258.936	0.000183052	3.11934	UP
ILMN_1795906	5092	PCBD1	101.401	886.968	1.87126e-05	3.12881	UP
ILMN_1673795	3295	HSD17B4	235.213	2071.32	1.15897e-05	3.13851	UP
ILMN_2410516	5494	PPM1A	34.0727	302.674	0.000692867	3.15108	UP
ILMN_3229733	10280	SIGMAR1	51.7305	461.078	0.000370882	3.15592	UP
ILMN_1718907	10194	TSHZ1	30.4751	274.17	0.000140092	3.16937	UP
ILMN_2361163	23648	SSBP3	26.1313	244.025	0.000185093	3.22318	UP
ILMN_1691647	93659	CGB5	17.2279	161.332	0.00126929	3.22721	UP
ILMN_1806510	55275	VPS53	16.5179	156.399	0.00111663	3.24313	UP
ILMN_1694325	4784	NFIX	136.744	1346.19	9.92099e-06	3.29933	UP
ILMN_1712095	4303	FOXO4	59.3354	595.711	1.92886e-05	3.32765	UP
ILMN_1722974	643718	LOC643718	14.1741	143.07	0.00625145	3.33538	UP
ILMN_1673282	3920	LAMP2	232.934	2352.25	7.31e-06	3.33604	UP
ILMN_1726928	6920	TCEA3	89.0452	903.104	1.31614e-05	3.34228	UP
ILMN_3243274	399706	NCRNA00200	21.631	228.432	0.00018056	3.4006	UP
ILMN_1729188	57817	HAMP	14.7293	157.181	0.000885596	3.41566	UP
ILMN_1690295	648343	LOC648343	260.641	2783.96	6.15384e-06	3.417	UP
ILMN_1706005	2592	GALT	23.803	260.842	0.00548104	3.45396	UP
ILMN_2336781	6648	SOD2	186.246	2089.51	5.50499e-06	3.48788	UP
ILMN_1680662	163786	SASS6	17.2819	199.638	0.000274826	3.53005	UP
ILMN_2342695	5154	PDGFA	41.4374	496.376	1.67021e-05	3.58243	UP
ILMN_1715324	7923	HSD17B8	49.2545	596.833	1.22474e-05	3.599	UP
ILMN_1740842	6297	SALL2	22.8528	277.145	6.73002e-05	3.60019	UP
ILMN_3208014	100131866	LOC100131866	175.354	2190.41	4.41465e-06	3.64286	UP
ILMN_1667796	3040	HBA2	515.907	6485.72	4.53615e-06	3.65208	UP
ILMN_2219767	4613	MYCN	12.8819	162.556	0.00276708	3.65752	UP
ILMN_2306189	9500	MAGED1	71.4818	947.3	5.73918e-06	3.72817	UP
ILMN_1803698	8675	STX16	20.2295	275.671	5.46432e-05	3.76842	UP
ILMN_1661428	286410	ATP11C	18.6968	265.911	5.84587e-05	3.83008	UP
ILMN_1872456			29.9547	440.361	1.39599e-05	3.87783	UP
ILMN_1666853	644482	LOC644482	15.5141	235.274	8.37278e-05	3.92269	UP
ILMN_1780460	138199	C9orf41	21.9285	348.757	2.07751e-05	3.99134	UP
ILMN_1710124	152189	CMTM8	97.8598	1588.75	3.01897e-06	4.02103	UP
ILMN_1669718	55851	PSENEN	47.3624	777.862	4.65255e-06	4.0377	UP
ILMN_1701621	9997	SCO2	87.3908	1574.12	1.83619e-05	4.17092	UP
ILMN_3267451	729403	GAPDHL6	166.938	3547.62	1.40499e-06	4.40947	UP
ILMN_1782611	643870	LOC643870	120.549	2666.2	1.40499e-06	4.4671	UP
ILMN_1689456	26137	ZBTB20	28.5861	634.146	3.87546e-06	4.47143	UP
ILMN_1799015	5827	PXMP2	81.6619	1811.85	1.97385e-05	4.47166	UP
ILMN_1729374	2109	ETFB	188.417	4588.68	1.12302e-06	4.60608	UP
ILMN_1803073	56521	DNAJC12	17.7431	541.39	3.58795e-06	4.93134	UP
ILMN_2299612	129303	TMEM150A	52.2882	1627.07	1.13485e-06	4.95965	UP
ILMN_1712088	171425	CLYBL	13.1994	431.789	5.0837e-06	5.03178	UP
ILMN_1737604	55277	FLJ10986	19.203	648.511	2.46525e-06	5.07773	UP
ILMN_3240354	360155	CYCSP52	77.8337	2644.27	8.81295e-07	5.08633	UP
ILMN_1785324	4522	MTHFD1	27.5657	1021.2	1.33345e-06	5.21125	UP
ILMN_3292244	100132804	LOC100132804	15.52	591.083	0.000742045	5.25116	UP
ILMN_2328986	6720	SREBF1	32.3936	1878.04	7.12219e-07	5.85737	UP
ILMN_1705253	5789	PTPRD	12.948	861.627	1.13055e-06	6.05626	UP
ILMN_1740938	348	APOE	109.635	13653.4	3.75464e-07	6.96041	UP
ILMN_1747716	229	ALDOB	15.6196	2427.07	4.57035e-07	7.27972	UP
