# Supplementary material for: A New Mouse Model for the Study of Human Breast Cancer Metastasis
Source: PLoS One. 2012 Oct 31;7(10):e47995. doi: 10.1371/journal.pone.0047995 (PMC3485320; doi:10.1371/journal.pone.0047995)
Supplement: Table S3 — Transcripts differentially expressed (p<0.01) in MDA-MB-231 diaphragm metastases compared to primary mammary fat pad tumor xenografts in NSG mice (total 85). (XLSX) [file pone.0047995.s003.xlsx]

## Sheet: Table S3
Summary
Experiment	Illumina Microarray
Species	Human
Analysis software	Genome Studio v2011.1
Analysis module	Gene Expression v1.9
Normalization	Quantile
Background subtraction	Yes
Error model	Illumina custom with Benjamini-Hochberg FDR correction
Content Descriptor	HumanHT-12_V4_0_R2_15002873_B.bgx
Genome build	RefSeq Rel 38
Detection pvalue filter	0.05
Differential pvalue filter	0.01
Column descriptions
ProbeID	Illumina probe identifier
GeneID	Entrez gene identifier
Symbol	Official gene symbol
Group1_Signal	Average signal for samples in Group 1
Group2_Signal	Average signal for samples in Group 2
FDR corrected DiffPval	FDR corrected pvalue for differential expression call
log2FoldChange	log2(Group2_Signal/Group1_Signal)
Regulation	Up if log2FoldChange is positive, Down if log2FoldChange is negative
Group 1	Group 2	Filter	#Up-regulated probes	#Down-regulated probes	#Total
MDA231 primary tumor	MDA231 diaphragm mets	pvalue 0.01	32	53	85
Article title: A new mouse model for the study of human breast cancer metastasis.
Journal: PLOS ONE
Authors:Elizabeth Iorns, Katherine Drews-Elger, Toby M. Ward, Sonja Dean, Jennifer Clarke, Deborah Berry, Dorraya El Ashry and Marc Lippman
Affiliation: University of Miami Miller School of Medicine, Miami, FL, 33136, USA
Corresponding author email address: mlippman@med.miami.edu
Table S3
Transcripts differentially expressed (p<0.01) in MDA-MB-231 diaphragm metastases compared to primary mammary fat pad tumor (total 85)
ProbeID	GeneID	Symbol	PrimaryTumor_Signal	DiaphragmMets_Signal	FDR corrected DiffPval	log2FoldChange	Regulation
ILMN_1733559	100008589	LOC100008589	850.347	130.51	1.16e-33	-2.7039	DOWN
ILMN_3249578	100132394	LOC100132394	1083.88	171.918	4.37e-31	-2.6564	DOWN
ILMN_3251587	100008589	LOC100008589	1125.66	268.78	7.62e-20	-2.06627	DOWN
ILMN_3246805	100134364	LOC100134364	619.754	104.242	2.1e-19	-2.57176	DOWN
ILMN_2384241	7048	TGFBR2	687.793	304.241	6.79e-18	-1.17676	DOWN
ILMN_1736597	7086	TKT	544.69	250.618	8.56e-15	-1.11994	DOWN
ILMN_1661599	54541	DDIT4	628.557	205.279	2.41e-11	-1.61446	DOWN
ILMN_1768534	8553	BHLHB2	895.346	459.215	1.73e-10	-0.963273	DOWN
ILMN_1726245	7048	TGFBR2	586.337	286.756	1.99e-10	-1.03191	DOWN
ILMN_1789702	2632	GBE1	331.377	161.459	2.49e-10	-1.0373	DOWN
ILMN_1756417	353322	ANKRD37	164.764	27.6174	1.37e-08	-2.57675	DOWN
ILMN_3266944	100129599	LOC100129599	1292.7	640.682	1.57e-08	-1.0127	DOWN
ILMN_3241051	644907	LOC644907	1092.53	588.155	2.64e-08	-0.893404	DOWN
ILMN_1691466	7525	YES1	290.685	150.215	1.93e-07	-0.95243	DOWN
ILMN_1655710	642989	LOC642989	677.752	262.926	5.72e-07	-1.3661	DOWN
ILMN_1725510	1718	DHCR24	150.52	52.4344	1.43e-06	-1.52137	DOWN
ILMN_2230016	25994	HIGD1A	540.036	293.939	2.85e-06	-0.877538	DOWN
ILMN_1739441	23193	GANAB	150.698	41.5992	9.03e-06	-1.85703	DOWN
ILMN_1713369	23521	RPL13A	2621.61	1567.87	5.04e-05	-0.741647	DOWN
ILMN_1724941	64866	CDCP1	277.229	116.855	6.46e-05	-1.24637	DOWN
ILMN_1805800	5868	RAB5A	137.471	32.5367	0.000101428	-2.07899	DOWN
ILMN_1702447	10644	IGF2BP2	472.184	285.313	0.000153596	-0.726804	DOWN
ILMN_1663799	6161	RPL32	11150.5	7686.29	0.000194315	-0.536754	DOWN
ILMN_2198300	64663	SPANXC	602.741	121.175	0.000449153	-2.31445	DOWN
ILMN_3198247	388707	LOC388707	1335.08	911.477	0.000586832	-0.550649	DOWN
ILMN_1764500	55845	C3orf10	343.636	173.091	0.000680531	-0.989352	DOWN
ILMN_2382990	3098	HK1	1369.59	821.133	0.000711453	-0.73806	DOWN
ILMN_1692168	65264	UBE2Z	157.978	79.2687	0.00128672	-0.994896	DOWN
ILMN_1779828	9695	EDEM1	135.777	63.4472	0.00134151	-1.09761	DOWN
ILMN_1709486	8406	SRPX	225.533	126.3	0.00134151	-0.836483	DOWN
ILMN_1787657	9069	CLDN12	207.771	83.0176	0.00147177	-1.3235	DOWN
ILMN_1659913	3669	ISG20	293.873	161.411	0.00147177	-0.864456	DOWN
ILMN_2347349	57820	CCNB1IP1	261.394	149.004	0.00170425	-0.810883	DOWN
ILMN_1811489	9943	OXSR1	335.015	204.749	0.00180596	-0.710371	DOWN
ILMN_3238435	677800	SNORA12	307.833	131.889	0.00185593	-1.22283	DOWN
ILMN_1892403	692084	SNORD13	826.661	180.383	0.00193128	-2.19623	DOWN
ILMN_1775744	51021	MRPS16	138.985	45.8038	0.00215655	-1.60139	DOWN
ILMN_2224486	57415	C3orf14	329.928	202.232	0.00215655	-0.706139	DOWN
ILMN_1752837	55207	ARL8B	161.298	85.8069	0.00260978	-0.910564	DOWN
ILMN_3216125	728126	LOC728126	2725.06	1810.35	0.00274951	-0.590019	DOWN
ILMN_2341815	10342	TFG	840.522	587.427	0.00341815	-0.516877	DOWN
ILMN_3245517	100134273	LOC100134273	1369.62	700.552	0.00395836	-0.967214	DOWN
ILMN_3235221	644936	LOC644936	579.779	368.119	0.00415348	-0.655332	DOWN
ILMN_3188984	441951	C20orf199	1637	1053.74	0.00495958	-0.63554	DOWN
ILMN_1708167	64866	CDCP1	97.5469	28.1031	0.0055444	-1.79537	DOWN
ILMN_1663042	6385	SDC4	375.376	231.381	0.00592738	-0.698066	DOWN
ILMN_1687538	2113	ETS1	490.224	324.527	0.00592738	-0.595105	DOWN
ILMN_1713901	11015	KDELR3	112.175	50.165	0.00660594	-1.161	DOWN
ILMN_3237324	64210	MMS19	397.664	238.198	0.00702133	-0.739388	DOWN
ILMN_3236481	100129086	LOC100129086	339.271	190.213	0.00716305	-0.834824	DOWN
ILMN_1721621	4820	NKTR	256.514	163.455	0.0076538	-0.650143	DOWN
ILMN_2055477	23016	EXOSC7	141.423	65.3999	0.00800011	-1.11265	DOWN
ILMN_1755749	5230	PGK1	1817.36	1213.51	0.00914233	-0.582659	DOWN
ILMN_1740938	348	APOE	109.635	464.411	8.69e-34	2.0827	UP
ILMN_2296950	200316	APOBEC3F	47.6109	510.059	8.69e-34	3.4213	UP
ILMN_1667796	3040	HBA2	515.907	2327.96	2.41e-11	2.17388	UP
ILMN_2306189	9500	MAGED1	71.4818	269.26	2.17e-10	1.91335	UP
ILMN_3206343	644914	LOC644914	574.589	1392.21	5.77e-10	1.27677	UP
ILMN_1749078	7077	TIMP2	27.7114	128.751	2.79e-06	2.21604	UP
ILMN_1691647	93659	CGB5	17.2279	120.158	3.77e-06	2.80211	UP
ILMN_1699015	3020	H3F3A	1678.07	3039.76	4.42e-05	0.857149	UP
ILMN_1789136	10169	SERF2	504.272	975.183	0.000101969	0.951472	UP
ILMN_2242491	23059	CLUAP1	7397.23	12246.3	0.000127234	0.727289	UP
ILMN_1810214	3727	JUND	1603.24	2716.55	0.000407815	0.760789	UP
ILMN_1718907	10194	TSHZ1	30.4751	111.743	0.000462661	1.87448	UP
ILMN_1851639			18.4036	115.471	0.000711453	2.64946	UP
ILMN_1807833	81502	HM13	73.6476	170.046	0.00129022	1.20721	UP
ILMN_1907834			89.5661	186.28	0.00180596	1.05644	UP
ILMN_1784871	2194	FASN	636.138	1098.18	0.00193128	0.7877	UP
ILMN_1806692	3074	HEXB	575.821	996.988	0.00215708	0.791955	UP
ILMN_1775522	9500	MAGED1	159.577	285.084	0.00248361	0.837132	UP
ILMN_1664028	1059	CENPB	158.941	281.9	0.00315878	0.826688	UP
ILMN_1677768	5447	POR	61.1811	156.22	0.00415348	1.35242	UP
ILMN_1886493			141.801	253.646	0.00461254	0.838952	UP
ILMN_3188110	55049	C19orf60	236.9	489.947	0.00517916	1.04835	UP
ILMN_1704385	347376	LOC347376	103.918	322.522	0.00553601	1.63395	UP
ILMN_1735579	94115	CGB8	23.299	114.985	0.00553601	2.30311	UP
ILMN_1778991	4781	NFIB	276.94	552.318	0.00565189	0.995926	UP
ILMN_2402930	440926	LOC440926	1590.65	2411.88	0.00690828	0.600546	UP
ILMN_1730291	481	ATP1B1	99.8755	221.197	0.00690828	1.14713	UP
ILMN_1735402	8816	WDR22	43.8376	113.625	0.00718621	1.37403	UP
ILMN_1872456			29.9547	136.954	0.00718621	2.19284	UP
ILMN_1774661	6628	SNRPB	701.17	1312.04	0.0076538	0.903981	UP
ILMN_1665865	3487	IGFBP4	569.042	1806.21	0.00914686	1.66636	UP
ILMN_2389211	3903	LAIR1	9321.82	13897.9	0.00938566	0.576182	UP
