# Supplementary material for: A New Mouse Model for the Study of Human Breast Cancer Metastasis
Source: PLoS One. 2012 Oct 31;7(10):e47995. doi: 10.1371/journal.pone.0047995 (PMC3485320; doi:10.1371/journal.pone.0047995)
Supplement: Table S4 — Transcripts differentially expressed (p<0.01) in MDA-MB-231 lymph node metastases compared to primary mammary fat pad tumor xenografts in NSG mice (total 24). (XLSX) [file pone.0047995.s004.xlsx]

## Sheet: Table S4
Summary
Experiment	Illumina Microarray
Species	Human
Analysis software	Genome Studio v2011.1
Analysis module	Gene Expression v1.9
Normalization	Quantile
Background subtraction	Yes
Error model	Illumina custom with Benjamini-Hochberg FDR correction
Content Descriptor	HumanHT-12_V4_0_R2_15002873_B.bgx
Genome build	RefSeq Rel 38
Detection pvalue filter	0.05
Differential pvalue filter	0.01
Column descriptions
ProbeID	Illumina probe identifier
GeneID	Entrez gene identifier
Symbol	Official gene symbol
Group1_Signal	Average signal for samples in Group 1
Group2_Signal	Average signal for samples in Group 2
FDR corrected DiffPval	FDR corrected pvalue for differential expression call
log2FoldChange	log2(Group2_Signal/Group1_Signal)
Regulation	Up if log2FoldChange is positive, Down if log2FoldChange is negative
Group 1	Group 2	Filter	#Up-regulated probes	#Down-regulated probes	#Total
MDA231 primary tumor	MDA231 lymph node mets	pvalue 0.01	12	12	24
Article title: A new mouse model for the study of human breast cancer metastasis.
Journal: PLOS ONE
Authors:Elizabeth Iorns, Katherine Drews-Elger, Toby M. Ward, Sonja Dean, Jennifer Clarke, Deborah Berry, Dorraya El Ashry and Marc Lippman
Affiliation: University of Miami Miller School of Medicine, Miami, FL, 33136, USA
Corresponding author email address: mlippman@med.miami.edu
Table S4
Transcripts differentially expressed (p<0.01) in MDA-MB-231 lymph node metastases compared to primary mammary fat pad tumor (total 24)
ProbeID	GeneID	Symbol	PrimaryTumor_Signal	LymphNodeMets_Signal	FDR corrected DiffPval	log2FoldChange	Regulation
ILMN_1713369	23521	RPL13A	2621.61	1603.25	8.405e-09	-0.70945	DOWN
ILMN_1737406	1316	KLF6	330.952	197.725	3.28757e-07	-0.743123	DOWN
ILMN_2138765	123	PLIN2	247.296	139.291	0.000266332	-0.828133	DOWN
ILMN_1735014	1316	KLF6	802.296	527.094	0.000382335	-0.606074	DOWN
ILMN_3266944	100129599	LOC100129599	1292.7	743.401	0.000767034	-0.798172	DOWN
ILMN_1663042	6385	SDC4	375.376	216.967	0.000882782	-0.790861	DOWN
ILMN_1789702	2632	GBE1	331.377	215.945	0.0012793	-0.617811	DOWN
ILMN_1656501	1847	DUSP5	391.094	248.959	0.00167928	-0.651608	DOWN
ILMN_1812640	196	AHR	1100.51	765.837	0.00167928	-0.523068	DOWN
ILMN_1783709	10670	RRAGA	579.151	425.925	0.00167928	-0.443339	DOWN
ILMN_1659913	3669	ISG20	293.873	173.025	0.00480599	-0.76421	DOWN
ILMN_1670028	9663	LPIN2	203.727	125.253	0.00872162	-0.701788	DOWN
ILMN_3267451	729403	GAPDHL6	166.938	874.569	4.1946e-11	2.38926	UP
ILMN_1917341			143.894	250.929	0.00039276	0.802272	UP
ILMN_1789136	10169	SERF2	504.272	699.772	0.000529413	0.472683	UP
ILMN_1687858	805	CALM2	2759.52	3650.36	0.00126526	0.403625	UP
ILMN_1775522	9500	MAGED1	159.577	266.28	0.0012793	0.738686	UP
ILMN_1790461	84300	C6orf125	262.997	501.714	0.00167928	0.93182	UP
ILMN_3241853	91695	RRP7B	8935.22	11657.1	0.0017615	0.383633	UP
ILMN_2242491	23059	CLUAP1	7397.23	9512.27	0.00283632	0.362805	UP
ILMN_1694177	5111	PCNA	274.023	464.108	0.00325763	0.760165	UP
ILMN_1706505	1289	COL5A1	47.8536	152.048	0.00480599	1.66783	UP
ILMN_2342695	5154	PDGFA	41.4374	137.471	0.00909331	1.73012	UP
ILMN_1786065	29128	UHRF1	465.477	678.908	0.00943267	0.544505	UP
