# Supplementary material for: A New Mouse Model for the Study of Human Breast Cancer Metastasis
Source: PLoS One. 2012 Oct 31;7(10):e47995. doi: 10.1371/journal.pone.0047995 (PMC3485320; doi:10.1371/journal.pone.0047995)
Supplement: Table S6 — Transcripts differentially expressed (p<0.01) in MDA-MB-436 lung metastases compared to primary mammary fat pad tumor xenografts in NSG mice (total 719). (XLSX) [file pone.0047995.s006.xlsx]

## Sheet: Table S6
Summary
Experiment	Illumina Microarray
Species	Human
Analysis software	Genome Studio v2011.1
Analysis module	Gene Expression v1.9
Normalization	Quantile
Background subtraction	Yes
Error model	Illumina custom with Benjamini-Hochberg FDR correction
Content Descriptor	HumanHT-12_V4_0_R2_15002873_B.bgx
Genome build	RefSeq Rel 38
Detection pvalue filter	0.05
Differential pvalue filter	0.01
Column descriptions
ProbeID	Illumina probe identifier
GeneID	Entrez gene identifier
Symbol	Official gene symbol
Group1_Signal	Average signal for samples in Group 1
Group2_Signal	Average signal for samples in Group 2
FDR corrected DiffPval	FDR corrected pvalue for differential expression call
log2FoldChange	log2(Group2_Signal/Group1_Signal)
Regulation	Up if log2FoldChange is positive, Down if log2FoldChange is negative
Group 1	Group 2	Filter	#Up-regulated probes	#Down-regulated probes	#Total
MDA436 primary tumor	MDA436 lung mets	pvalue 0.01	1	718	719
Article title: A new mouse model for the study of human breast cancer metastasis.
Journal: PLOS ONE
Authors:Elizabeth Iorns, Katherine Drews-Elger, Toby M. Ward, Sonja Dean, Jennifer Clarke, Deborah Berry, Dorraya El Ashry and Marc Lippman
Affiliation: University of Miami Miller School of Medicine, Miami, FL, 33136, USA
Corresponding author email address: mlippman@med.miami.edu
Table S6
Transcripts differentially expressed (p<0.01) in MDA-MB-436 lung metastases compared to primary mammary fat pad tumor (total 719)
ProbeID	GeneID	Symbol	PrimaryTumor_Signal	LungMets_Signal	FDR corrected DiffPval	log2FoldChange	Regulation
ILMN_2413158	5420	PODXL	2588.2	202.509	4.33389e-29	-3.67589	Down
ILMN_1725241	373156	GSTK1	1057.09	92.9507	3.26614e-16	-3.50749	Down
ILMN_3211132	645173	LOC645173	3777.82	339.897	1.44814e-17	-3.47438	Down
ILMN_1807423	10643	IGF2BP3	792.946	73.0228	5.78006e-12	-3.4408	Down
ILMN_2393254	826	CAPNS1	904.269	85.2131	1.11161e-10	-3.4076	Down
ILMN_2136089	644314	MTE	789.96	75.7672	6.66871e-16	-3.38213	Down
ILMN_1806023	3725	JUN	1285.93	123.758	1.11777e-09	-3.37722	Down
ILMN_1736597	7086	TKT	1323.54	128.721	3.26975e-14	-3.36209	Down
ILMN_1892403	692084	SNORD13	2458.65	239.878	0.00186663	-3.35749	Down
ILMN_1810334	149951	COMMD7	1090.56	108.436	6.82799e-16	-3.33016	Down
ILMN_1755974	230	ALDOC	1605.53	164.9	1.51736e-08	-3.28338	Down
ILMN_1716913	58485	TRAPPC1	789.531	81.7779	2.7197e-11	-3.27121	Down
ILMN_1653115	1891	ECH1	876.655	93.454	1.40067e-10	-3.22968	Down
ILMN_2112493	1611	DAP	916.282	98.0575	1.01821e-13	-3.22409	Down
ILMN_3226082	728620	LOC728620	755.243	82.0353	2.70071e-08	-3.20262	Down
ILMN_1739001	4070	TACSTD2	613.475	68.0329	8.88382e-07	-3.1727	Down
ILMN_3294222	100132673	LOC100132673	943.853	105.817	4.03637e-09	-3.15699	Down
ILMN_1663080	3955	LFNG	835.937	94.1434	3.91073e-07	-3.15046	Down
ILMN_2279961	3920	LAMP2	609.23	69.6612	5.47955e-07	-3.12856	Down
ILMN_1709809	4809	NHP2L1	966.378	110.817	4.77785e-07	-3.1244	Down
ILMN_1744912	2017	CTTN	682.957	78.4241	3.3194e-09	-3.12243	Down
ILMN_1670841	8904	CPNE1	585.152	67.358	1.01618e-06	-3.11889	Down
ILMN_1671583	23608	MKRN1	711.866	82.7193	2.60605e-10	-3.10531	Down
ILMN_2052598	83787	ARMC10	623.268	73.4505	3.79246e-11	-3.08501	Down
ILMN_2260991	706	TSPO	827.064	99.0929	1.44647e-17	-3.06115	Down
ILMN_1765459	6284	S100A13	898.071	109.24	4.46136e-08	-3.03933	Down
ILMN_1704286	53827	FXYD5	2636.1	325.522	2.42834e-10	-3.01758	Down
ILMN_3241234	730278	LOC730278	780.986	97.2548	2.69504e-10	-3.00546	Down
ILMN_1687247	64847	SPATA20	990.876	124.62	8.75125e-09	-2.99117	Down
ILMN_2368713	387522	TMEM189-UBE2V1	903.263	114.217	3.02414e-08	-2.98337	Down
ILMN_1734276	56937	PMEPA1	1209.26	153.637	1.36696e-07	-2.97653	Down
ILMN_1781580	25798	BRI3	777.255	99.2402	1.21582e-07	-2.96939	Down
ILMN_2086105	81848	SPRY4	674.968	86.6523	0.000266844	-2.96151	Down
ILMN_1665428	79792	GSDMD	553.456	71.506	5.91737e-05	-2.95233	Down
ILMN_1811754	4716	NDUFB10	1144.63	148.501	1.79082e-07	-2.94634	Down
ILMN_1653708	57175	CORO1B	508.221	66.2043	2.13982e-05	-2.94046	Down
ILMN_1655561	10094	ARPC3	1114.41	145.329	3.90157e-05	-2.93888	Down
ILMN_2376133	57179	KIAA1191	860.17	112.226	2.12264e-07	-2.93822	Down
ILMN_1766169	586	BCAT1	1026.35	133.993	2.21041e-21	-2.93729	Down
ILMN_1663954	51497	TH1L	814.089	106.704	9.54965e-08	-2.93157	Down
ILMN_1788955	9124	PDLIM1	1066.33	140.146	9.41788e-07	-2.92765	Down
ILMN_1729509	25912	C1orf43	660.365	86.8144	7.63725e-07	-2.92726	Down
ILMN_2349658	706	TSPO	1419.8	186.815	6.06158e-07	-2.926	Down
ILMN_3241218	54467	ANKIB1	603.364	79.6019	3.19463e-08	-2.92215	Down
ILMN_2157435	83658	DYNLRB1	1071.69	141.46	3.32549e-11	-2.92142	Down
ILMN_1733356	25843	PREI3	595.171	78.6847	1.05324e-10	-2.91915	Down
ILMN_1669550	10459	MAD2L2	851.784	112.746	3.77308e-08	-2.91741	Down
ILMN_2248589	79665	DHX40	617.821	82.4779	2.65584e-05	-2.90511	Down
ILMN_1718063	3988	LIPA	518.132	69.6092	0.000672212	-2.89597	Down
ILMN_1741491	10467	ZNHIT1	1174.9	158.007	1.40067e-10	-2.89448	Down
ILMN_1674551	4090	SMAD5	596.326	80.3358	1.00418e-06	-2.89198	Down
ILMN_2381841	11269	DDX19B	529.741	71.743	2.11691e-06	-2.88438	Down
ILMN_1679796	9804	TOMM20	1452.69	197.425	1.09804e-05	-2.87935	Down
ILMN_1657977	22921	MSRB2	732.585	99.9478	3.3049e-06	-2.87375	Down
ILMN_1765520	4528	MTIF2	557.427	76.302	9.80647e-06	-2.86899	Down
ILMN_2389876	7041	TGFB1I1	533.232	73.0523	7.60757e-06	-2.86776	Down
ILMN_1753002	84932	RAB2B	1191.64	164.228	1.83973e-07	-2.85918	Down
ILMN_2247664	6651	SON	661.435	91.2639	1.24675e-06	-2.85748	Down
ILMN_2359345	10276	NET1	626.086	86.7332	1.22634e-05	-2.85171	Down
ILMN_1770290	1265	CNN2	689.03	96.0884	2.93211e-07	-2.84213	Down
ILMN_2125675	728643	LOC728643	1522.03	212.696	0.000219766	-2.83913	Down
ILMN_1768449	5635	PRPSAP1	611.18	85.744	4.86762e-08	-2.83349	Down
ILMN_1699856	5900	RALGDS	1149.31	161.313	1.89875e-06	-2.83283	Down
ILMN_3247462	10539	GLRX3	697.384	98.1574	1.50957e-08	-2.82878	Down
ILMN_1801766	55013	CCDC109B	621.029	87.9068	2.12185e-05	-2.82062	Down
ILMN_1735014	1316	KLF6	1503.66	213.501	1.36085e-09	-2.81617	Down
ILMN_1796244	10421	CD2BP2	664.138	94.5818	1.39086e-08	-2.81185	Down
ILMN_2056479	10539	TXNL2	658.558	93.8143	4.07805e-08	-2.81143	Down
ILMN_1843198			677.548	97.3792	5.9392e-07	-2.79864	Down
ILMN_2075189	54733	SLC35F2	520.159	74.8262	6.78768e-05	-2.79734	Down
ILMN_1664921	5537	PPP6C	552.122	79.9584	0.000659438	-2.78766	Down
ILMN_1655418	826	CAPNS1	2015.09	292.106	6.67764e-07	-2.78628	Down
ILMN_1718610	55114	ARHGAP17	520.212	75.5017	2.89727e-05	-2.78452	Down
ILMN_1714527	9341	VAMP3	912.99	132.946	5.68431e-05	-2.77976	Down
ILMN_1773576	8895	CPNE3	756.76	110.197	4.58538e-06	-2.77975	Down
ILMN_1687508	501	ALDH7A1	817.776	119.578	2.55716e-07	-2.77375	Down
ILMN_1811489	9943	OXSR1	644.175	94.6628	7.45236e-06	-2.76658	Down
ILMN_1756439	9805	SCRN1	715.452	105.206	7.03205e-05	-2.76564	Down
ILMN_2381753	9908	G3BP2	1027.45	151.71	3.5677e-06	-2.75967	Down
ILMN_1717337	64844	MARCH7	607.635	89.9324	0.000262541	-2.75629	Down
ILMN_1659766	9531	BAG3	1292.82	192.518	1.41211e-05	-2.74746	Down
ILMN_1677440	10159	ATP6AP2	1048.81	156.196	3.12023e-06	-2.74732	Down
ILMN_1700518	10473	HMGN4	1395.03	207.848	7.3942e-07	-2.7467	Down
ILMN_1802780	283316	M160	1313.53	196.345	2.6625e-07	-2.74198	Down
ILMN_2415748	26118	WSB1	541.445	80.9371	0.00423073	-2.74194	Down
ILMN_1748093	5050	PAFAH1B3	988.581	147.982	1.15859e-05	-2.73993	Down
ILMN_1673962	23165	NUP205	559.354	83.7547	2.28128e-06	-2.73952	Down
ILMN_3242540	283316	CD163L1	925.857	139.206	4.55196e-22	-2.73357	Down
ILMN_2413779	26470	SEZ6L2	488.147	73.597	0.000415714	-2.72959	Down
ILMN_1667893	64759	TNS3	999.467	151.22	1.52606e-05	-2.72451	Down
ILMN_1728907	9522	SCAMP1	708.003	107.303	8.41525e-06	-2.72206	Down
ILMN_1749327	5603	MAPK13	699.701	106.358	1.83668e-07	-2.71781	Down
ILMN_1790136	55257	C20orf20	926.822	140.977	1.24753e-05	-2.71683	Down
ILMN_1734190	85012	TCEAL3	724.731	110.529	2.57883e-05	-2.71302	Down
ILMN_1803392	30851	TAX1BP3	1255.53	191.731	5.9392e-07	-2.71114	Down
ILMN_1671932	25813	SAMM50	593.737	90.9282	3.71842e-05	-2.70702	Down
ILMN_1671893	27243	CHMP2A	698.036	107.167	1.78467e-06	-2.70344	Down
ILMN_2094166	51510	CHMP5	957.017	146.945	3.84166e-05	-2.70327	Down
ILMN_1683658	2280	FKBP1A	1783.58	274.585	6.5256e-09	-2.69945	Down
ILMN_1760858	4218	RAB8A	737.893	113.656	8.00957e-06	-2.69873	Down
ILMN_1691104	441531	PGAM4	1810.37	279.038	8.25443e-13	-2.69775	Down
ILMN_2399896	22872	SEC31A	965.637	149.519	8.298e-06	-2.69115	Down
ILMN_1757384	5901	RAN	756.879	117.55	0.00088093	-2.68679	Down
ILMN_1728049	140576	S100A16	1554.21	241.669	3.29391e-05	-2.68508	Down
ILMN_2063586	25932	CLIC4	981.957	152.73	0.000115569	-2.68468	Down
ILMN_1655340	51255	RNF181	1316.77	205.836	8.42762e-07	-2.67744	Down
ILMN_1708151	8270	LAGE3	874.189	137.04	2.01301e-07	-2.67335	Down
ILMN_2365544	55651	NHP2	1188	186.568	6.42597e-06	-2.67075	Down
ILMN_1777740	51337	C8orf55	501.759	78.9142	0.000215973	-2.66864	Down
ILMN_1775170	4501	MT1X	4568.89	719.083	7.66142e-07	-2.66761	Down
ILMN_2041190	2150	F2RL1	1077.56	169.787	0.000106299	-2.66597	Down
ILMN_3297996	728732	LOC728732	822.683	130.251	3.52877e-05	-2.65904	Down
ILMN_1719392	2271	FH	518.497	82.1568	0.000137186	-2.65788	Down
ILMN_1671928	5627	PROS1	459.067	72.8925	0.000881627	-2.65486	Down
ILMN_2172269	653659	TMEM183B	530.542	84.538	2.68929e-05	-2.64979	Down
ILMN_2366634	5315	PKM2	1463.47	236.486	4.52167e-10	-2.62957	Down
ILMN_1721704	2339	FNTA	456.7	73.8937	0.00040184	-2.62772	Down
ILMN_2347068	2872	MKNK2	751.897	121.966	0.000297729	-2.62405	Down
ILMN_1809931	10397	NDRG1	2128.76	345.83	5.3327e-06	-2.62188	Down
ILMN_2326997	1725	DHPS	541.208	87.9283	7.76119e-05	-2.62178	Down
ILMN_3241469	100134537	LOC100134537	661.938	107.925	3.08914e-05	-2.61667	Down
ILMN_2051232	6389	SDHA	402.272	65.6126	0.00686141	-2.61613	Down
ILMN_2079803	26065	LSM14A	712.269	116.259	3.48775e-07	-2.61508	Down
ILMN_1714623	56993	TOMM22	856.054	139.809	0.000502892	-2.61425	Down
ILMN_1721669	3420	IDH3B	1051.9	171.906	8.15318e-05	-2.61331	Down
ILMN_2348050	219927	MRPL21	759.647	124.25	1.49606e-05	-2.61208	Down
ILMN_3283772	644237	LOC644237	1432.71	234.434	3.71926e-08	-2.61149	Down
ILMN_1710326	56650	CLDND1	598.297	97.9588	5.8759e-05	-2.61062	Down
ILMN_1733511	2802	GOLGA3	639.789	105.009	0.000845761	-2.60709	Down
ILMN_1763638	8412	BCAR3	1300.6	213.486	0.00183554	-2.60696	Down
ILMN_2192385	54902	TTC19	599.66	98.5003	1.32743e-07	-2.60595	Down
ILMN_2382829	7001	PRDX2	805.91	132.561	6.17662e-06	-2.60396	Down
ILMN_1759184	84798	C19orf48	500.073	82.3656	4.72924e-05	-2.60202	Down
ILMN_1762281	11258	DCTN3	1076.23	177.431	8.20508e-07	-2.60066	Down
ILMN_1669635	79902	NUP85	565.409	93.4493	0.00193699	-2.59704	Down
ILMN_1685678	1933	EEF1B2	529.695	87.969	9.40336e-05	-2.5901	Down
ILMN_2105983	7520	XRCC5	460.122	76.7746	7.26695e-05	-2.58331	Down
ILMN_1786039	80196	RNF34	519.244	86.6484	0.000401903	-2.58317	Down
ILMN_1774077	2634	GBP2	1574.39	262.76	1.93423e-05	-2.58297	Down
ILMN_1768505	3597	IL13RA1	761.175	127.047	0.000399702	-2.58287	Down
ILMN_1708143	8933	FAM127A	955.068	159.489	1.93423e-05	-2.58215	Down
ILMN_2359456	51614	ERGIC3	626.136	105.14	8.35599e-05	-2.57416	Down
ILMN_2075794	126205	NLRP8	741.279	124.771	0.00328505	-2.57073	Down
ILMN_2125374	55907	CMAS	652.724	109.953	0.000364914	-2.56959	Down
ILMN_2405018	5500	PPP1CB	532.564	89.7799	0.000150539	-2.56849	Down
ILMN_1732060	392	ARHGAP1	534.468	90.4417	0.000266844	-2.56304	Down
ILMN_1805737	5214	PFKP	1365.86	231.247	1.56198e-05	-2.5623	Down
ILMN_1696021	23633	KPNA6	435.22	73.7701	0.000365021	-2.56064	Down
ILMN_1700681	83692	CD99L2	440.531	74.8492	0.000276693	-2.55719	Down
ILMN_1711314	11164	NUDT5	428.702	72.9111	0.00203392	-2.55576	Down
ILMN_1771620	6629	SNRPB2	428.082	73.0105	0.0022774	-2.55171	Down
ILMN_1671565	8635	RNASET2	1279.41	218.782	3.20359e-05	-2.54792	Down
ILMN_1671191	7384	UQCRC1	1018.13	174.186	0.000144786	-2.54723	Down
ILMN_1751072	58477	SRPRB	507.879	87.1007	0.00138155	-2.54373	Down
ILMN_1685289	64755	C16orf58	765.725	131.345	0.000588361	-2.54347	Down
ILMN_1683598	2182	ACSL4	454.067	78.2476	0.000193704	-2.53679	Down
ILMN_3247895	728188	LOC728188	996.961	172.288	3.44262e-10	-2.53271	Down
ILMN_1791726	10381	TUBB3	1040.06	180.074	0.000171912	-2.53001	Down
ILMN_2380771	10327	AKR1A1	746.749	129.444	0.000566384	-2.5283	Down
ILMN_1681591	5770	PTPN1	580.793	101.017	0.000636104	-2.52343	Down
ILMN_1702247	23582	CCNDBP1	1052.81	183.788	1.74714e-06	-2.51812	Down
ILMN_1752802	81037	CLPTM1L	892.521	155.867	0.000523079	-2.51757	Down
ILMN_1749345	6811	STX5	799.327	139.646	0.000346872	-2.51701	Down
ILMN_2316540	65003	MRPL11	713.884	124.969	0.000174531	-2.51412	Down
ILMN_1760280	29107	NXT1	496.113	87.0482	0.000270669	-2.51078	Down
ILMN_1695423	928	CD9	392.943	68.9563	0.00745589	-2.51057	Down
ILMN_2213558	286102	TMED10P	1128.95	198.776	3.54703e-05	-2.50576	Down
ILMN_2038777	60	ACTB	8420.18	1485.5	4.06383e-29	-2.50291	Down
ILMN_1655765	54460	MRPS21	391.853	69.1714	0.00626437	-2.50207	Down
ILMN_2384241	7048	TGFBR2	1022.65	180.608	0.000802924	-2.50138	Down
ILMN_1744835	219927	MRPL21	956.12	168.976	0.000290953	-2.50037	Down
ILMN_2230902	1495	CTNNA1	1730.32	306.504	2.43869e-05	-2.49706	Down
ILMN_1735360	55153	SDAD1	901.476	160.219	0.00039923	-2.49225	Down
ILMN_1692651	5245	PHB	690.291	122.837	0.000414442	-2.49046	Down
ILMN_3224290	730052	LOC730052	564.428	100.651	0.00109059	-2.48742	Down
ILMN_1707503	26099	C1orf144	400.823	71.4787	0.00269708	-2.48738	Down
ILMN_1685824	9334	B4GALT5	1056.97	188.666	0.00040098	-2.48603	Down
ILMN_1707336	10093	ARPC4	846.709	151.275	0.000127151	-2.48469	Down
ILMN_1703132	57226	LYRM2	522.497	93.3808	0.00162312	-2.48422	Down
ILMN_1659027	6513	SLC2A1	1183.35	212.072	2.67016e-10	-2.48025	Down
ILMN_1666399	6015	RING1	1232.51	221.109	4.9042e-05	-2.47877	Down
ILMN_1693394	10295	BCKDK	1114.03	199.87	4.9042e-05	-2.47865	Down
ILMN_1711573	10225	CD96	559.764	100.499	0.00279758	-2.47764	Down
ILMN_1768867	8546	AP3B1	1061.42	190.643	0.000370895	-2.47705	Down
ILMN_1771003	54930	HAUS4	539.199	96.9458	3.1808e-05	-2.47557	Down
ILMN_1697420	26277	TINF2	678.992	122.197	6.97733e-05	-2.47419	Down
ILMN_1726981	7423	VEGFB	1605.82	289.199	0.000979101	-2.47318	Down
ILMN_1664922	2317	FLNB	853.734	153.763	0.000668983	-2.47307	Down
ILMN_1760143	11047	ADRM1	1283.48	231.276	5.04175e-05	-2.47237	Down
ILMN_1735788	11078	TRIOBP	522.756	94.2775	0.000323734	-2.47115	Down
ILMN_1669206	23019	CNOT1	1101.33	198.863	0.000301215	-2.4694	Down
ILMN_2415179	22883	CLSTN1	814.061	147.424	0.00065875	-2.46516	Down
ILMN_1723625	5871	MAP4K2	415.563	75.3544	0.00231235	-2.46331	Down
ILMN_3227811	729423	LOC729423	760.811	138.005	0.00152995	-2.46282	Down
ILMN_1671554	23175	LPIN1	743.854	134.949	0.000366972	-2.4626	Down
ILMN_1722648	10262	SF3B4	806.724	146.627	0.00025285	-2.45992	Down
ILMN_1716730	91272	FAM44B	868.304	157.919	8.41706e-05	-2.45902	Down
ILMN_1672389	1429	CRYZ	923.524	168.205	1.64162e-06	-2.45693	Down
ILMN_1664750	51643	TMBIM4	1361.37	248.542	1.29826e-05	-2.4535	Down
ILMN_1807994	57092	PCNP	1566.33	286.365	7.76326e-05	-2.45146	Down
ILMN_1660749	79058	ASPSCR1	742.252	136.041	0.000877926	-2.44787	Down
ILMN_2188204	9140	ATG12	630.652	115.752	0.00260719	-2.4458	Down
ILMN_2120273	8905	AP1S2	1034.2	189.994	0.000292876	-2.44449	Down
ILMN_1676846	6059	ABCE1	393.908	72.48	0.0090634	-2.4422	Down
ILMN_1808501	30011	SH3KBP1	859.679	158.183	0.000845911	-2.4422	Down
ILMN_1776102	5716	PSMD10	760.199	140.22	0.000635894	-2.43869	Down
ILMN_1721391	533	ATP6V0B	599.129	110.852	0.000515391	-2.43423	Down
ILMN_2075927	83931	STK40	387.23	71.7925	0.00976968	-2.43128	Down
ILMN_1682953	441531	PGAM4	878.565	162.935	3.4363e-06	-2.43086	Down
ILMN_1752582	5869	RAB5B	906.283	168.252	4.87036e-05	-2.42934	Down
ILMN_3297577	729841	LOC729841	555.115	103.127	0.00451415	-2.42836	Down
ILMN_1716687	7168	TPM1	525.014	97.5997	1.53929e-05	-2.42741	Down
ILMN_1806432	30833	NT5C	912.184	169.627	0.000602945	-2.42696	Down
ILMN_1745152	55245	UQCC	407.23	75.7735	0.00690669	-2.42608	Down
ILMN_1662954	10574	CCT7	1040.44	193.644	0.000373769	-2.42572	Down
ILMN_1779735	389541	C7orf59	1066.49	198.567	2.5316e-06	-2.42516	Down
ILMN_1734742	396	ARHGDIA	629.534	117.4	0.00121538	-2.42285	Down
ILMN_1733305	83939	EIF2A	906.676	169.209	0.000182455	-2.42178	Down
ILMN_1695706	3021	H3F3B	415.56	77.6211	0.00202952	-2.42054	Down
ILMN_1814113	51663	ZFR	532.389	99.6477	0.0011608	-2.41757	Down
ILMN_1713450	140465	MYL6B	1643.2	307.716	4.62369e-10	-2.41683	Down
ILMN_1651705	847	CAT	709.628	132.894	0.000304353	-2.41679	Down
ILMN_1706687	51088	KLHL5	705.799	132.277	0.00793031	-2.41569	Down
ILMN_1738819	9343	EFTUD2	652.939	122.487	0.00183554	-2.41431	Down
ILMN_1758633	81576	CCDC130	414.847	77.9624	0.00337783	-2.41173	Down
ILMN_1663541	11285	B4GALT7	484.464	91.0754	0.00029006	-2.41126	Down
ILMN_1703791	310	ANXA7	1269.78	239.912	0.000219766	-2.404	Down
ILMN_1726245	7048	TGFBR2	853.945	161.493	0.00025259	-2.40268	Down
ILMN_1743065	51495	PTPLAD1	757.221	143.467	8.26414e-06	-2.4	Down
ILMN_1808356	60343	FAM3A	691.038	130.983	0.000965219	-2.39939	Down
ILMN_1719204	26121	PRPF31	553.102	105.045	0.00933404	-2.39654	Down
ILMN_1749709	54539	NDUFB11	616.141	117.038	0.00122817	-2.39628	Down
ILMN_2401155	9698	PUM1	721.147	137.024	0.000519997	-2.39586	Down
ILMN_2354381	5445	PON2	837.953	159.26	0.000519997	-2.39549	Down
ILMN_1790881	3176	HNMT	488.735	93.1515	1.41942e-06	-2.3914	Down
ILMN_1917341			504.815	96.2314	0.000314126	-2.39117	Down
ILMN_1809477	23589	CARHSP1	729.216	139.114	0.000290953	-2.39008	Down
ILMN_2311166	3693	ITGB5	720.848	137.631	0.0066433	-2.38889	Down
ILMN_2390299	5696	PSMB8	713.416	136.572	0.000486505	-2.38509	Down
ILMN_1725510	1718	DHCR24	380.508	73.1136	0.00860055	-2.37972	Down
ILMN_1756220	8886	DDX18	801.373	154.047	0.00302956	-2.37911	Down
ILMN_1787844	56005	C19orf10	976.329	187.904	0.007377	-2.37737	Down
ILMN_1656676	79699	ZYG11B	462.622	89.1482	0.000253985	-2.37556	Down
ILMN_1815012	23265	EXOC7	776.829	150.22	0.00070868	-2.37052	Down
ILMN_1785711	4738	NEDD8	1017.53	197.085	0.000366972	-2.36818	Down
ILMN_1718672	55651	NHP2	1018.02	197.4	0.0017538	-2.36658	Down
ILMN_1656136	6780	STAU1	512.225	99.4042	0.00395526	-2.3654	Down
ILMN_3235148	388574	FLJ43681	982.912	190.937	3.43513e-07	-2.36397	Down
ILMN_3225591	144581	RPL14L	2554.66	496.391	4.35682e-17	-2.36358	Down
ILMN_1658259	4733	DRG1	645.15	125.769	0.0013256	-2.35886	Down
ILMN_1666208	55320	C14orf106	730.334	142.615	0.00163416	-2.35643	Down
ILMN_1776375	5300	PIN1	1068.68	208.826	0.000620426	-2.35546	Down
ILMN_1754738	8907	AP1M1	831.758	162.632	0.000168954	-2.35456	Down
ILMN_1656057	5328	PLAU	4407.47	861.787	6.99603e-08	-2.35455	Down
ILMN_1689318	9891	NUAK1	656.679	128.532	0.00266079	-2.35306	Down
ILMN_2388507	207	AKT1	891.069	174.617	0.00130745	-2.35134	Down
ILMN_1664776	23167	EFR3A	923.933	181.345	0.00227921	-2.34905	Down
ILMN_1786893	10181	RBM5	551.4	108.315	0.00352011	-2.34787	Down
ILMN_1740742	7389	UROD	1784.37	351.012	0.000140084	-2.34582	Down
ILMN_1651557	143888	KDELC2	718.581	141.41	0.00406087	-2.34527	Down
ILMN_1669015	7511	XPNPEP1	657.546	129.519	1.03199e-06	-2.34392	Down
ILMN_1738346	221154	EFHA1	451.033	88.9696	0.00958082	-2.34185	Down
ILMN_1766435	51729	WBP11	606.88	119.73	0.000263823	-2.34163	Down
ILMN_1678729	64374	SIL1	576.647	113.942	0.00270207	-2.33938	Down
ILMN_1654609	114915	TIGA1	734.569	145.261	0.000180224	-2.33825	Down
ILMN_1721349	84061	MAGT1	684.288	135.48	0.00776691	-2.33652	Down
ILMN_2210729	51657	STYXL1	760.491	150.621	0.00049465	-2.33601	Down
ILMN_1757072	642489	LOC642489	1619.4	320.777	2.06194e-05	-2.33582	Down
ILMN_1694240	5604	MAP2K1	1015.49	201.532	0.000356848	-2.33309	Down
ILMN_2189993	60488	MRPS35	426.898	84.7713	0.00346108	-2.33224	Down
ILMN_1703015	9406	ZRANB2	666.701	133.048	0.00448823	-2.32509	Down
ILMN_1670926	51363	CHST15	795.789	159.414	0.00304647	-2.31961	Down
ILMN_1771376	8682	PEA15	1009.51	202.28	0.00019289	-2.31924	Down
ILMN_2347349	57820	CCNB1IP1	648.995	130.083	7.625e-05	-2.31877	Down
ILMN_1730940	116138	KLHDC3	917.805	184.024	0.000943849	-2.31829	Down
ILMN_1717855	5201	PFDN1	980.214	196.709	0.00111355	-2.31703	Down
ILMN_1661537	54741	LEPROT	898.926	180.45	0.00996336	-2.31661	Down
ILMN_3211906	647030	LOC647030	922.306	185.204	2.74293e-05	-2.31613	Down
ILMN_1741204	23588	KLHDC2	602.073	121.053	0.00295365	-2.31429	Down
ILMN_1715684	3914	LAMB3	1380.27	278.215	8.5933e-07	-2.31068	Down
ILMN_1718132	1892	ECHS1	1203.86	242.693	8.1032e-05	-2.31046	Down
ILMN_1716093	3858	KRT10	754.339	152.25	6.78768e-05	-2.30878	Down
ILMN_1808202	91300	C19orf22	1102.11	222.514	0.000772663	-2.3083	Down
ILMN_1679949	79085	SLC25A23	651.468	131.601	0.00974314	-2.30752	Down
ILMN_1793118	8887	TAX1BP1	1050.79	212.756	0.000314598	-2.3042	Down
ILMN_1712400	5269	SERPINB6	1363.58	276.114	0.00138306	-2.30406	Down
ILMN_2155719	440673	NBPF10	1793.53	363.638	0.00110044	-2.30223	Down
ILMN_1736441	57026	PDXP	422.648	85.7105	0.00369231	-2.30191	Down
ILMN_2364022	9123	SLC16A3	1771.2	359.54	0.0018935	-2.3005	Down
ILMN_1714990	1629	DBT	594.673	120.77	0.00431417	-2.29983	Down
ILMN_1682264	10238	DCAF7	807.805	164.166	0.00533738	-2.29885	Down
ILMN_1764380	51228	GLTP	1844.65	375.297	2.528e-09	-2.29724	Down
ILMN_1691188	51720	UIMC1	693.865	141.364	0.00382876	-2.29523	Down
ILMN_2355831	2274	FHL2	796.046	162.537	0.000226019	-2.29208	Down
ILMN_1705442	123920	CMTM3	1873.68	382.95	2.22983e-06	-2.29065	Down
ILMN_1801864	730455	LOC730455	405.68	82.9425	3.24421e-05	-2.29016	Down
ILMN_1720542	5438	POLR2I	968.355	198.438	1.96669e-05	-2.28685	Down
ILMN_3280847	651697	LOC651697	481.987	98.7815	0.000783643	-2.28668	Down
ILMN_1717490	6128	RPL6	762.946	156.817	0.00229662	-2.2825	Down
ILMN_1682799	57559	STAMBPL1	893.147	183.68	0.00260178	-2.2817	Down
ILMN_1656399	90843	TCEAL8	435.012	89.4925	0.00501054	-2.28122	Down
ILMN_1790549	10099	TSPAN3	1042.14	215.154	0.00412048	-2.27611	Down
ILMN_1804327	4676	NAP1L4	951.511	196.45	0.00314517	-2.27605	Down
ILMN_2396648	51013	EXOSC1	1086.27	224.331	0.000814756	-2.27568	Down
ILMN_1679134	54780	NSMCE4A	729.192	150.75	0.00958668	-2.27414	Down
ILMN_1699362	3550	IK	476.952	98.829	0.000168437	-2.27084	Down
ILMN_1748650	84311	MRPL45	658.207	136.434	0.00606631	-2.27034	Down
ILMN_2412549	54433	GAR1	687.024	142.591	0.00606631	-2.26847	Down
ILMN_1675542	729148	LOC729148	564.211	117.252	0.000161176	-2.26663	Down
ILMN_2352009	37	ACADVL	515.51	107.406	0.000153066	-2.26292	Down
ILMN_1723177	51433	ANAPC5	1199.96	250.076	0.00012844	-2.26255	Down
ILMN_2352563	56650	CLDND1	707.807	147.626	0.00383447	-2.2614	Down
ILMN_3292163	391532	LOC391532	406.716	84.8922	0.000164985	-2.26032	Down
ILMN_1669046	94234	FOXQ1	1286.65	268.763	0.00339828	-2.25921	Down
ILMN_1726565	5296	PIK3R2	1513.11	316.092	0.000503467	-2.2591	Down
ILMN_1784641	4696	NDUFA3	1642.91	343.262	0.000894362	-2.25887	Down
ILMN_1724959	22872	SEC31A	548.994	114.925	0.00778722	-2.2561	Down
ILMN_1701269	509	ATP5C1	874.797	183.721	0.00201864	-2.25143	Down
ILMN_1761159	23344	ESYT1	862.226	181.366	0.00564469	-2.24916	Down
ILMN_1668540	54680	ZNHIT6	893.108	188.013	0.00661179	-2.248	Down
ILMN_1743829	6311	ATXN2	899.09	189.346	0.00298485	-2.24744	Down
ILMN_1659688	3959	LGALS3BP	1119.71	236.149	0.00602956	-2.24536	Down
ILMN_1793770	10049	DNAJB6	1069.09	225.706	0.00547947	-2.24386	Down
ILMN_3288587	100131785	LOC100131785	1030.78	217.875	2.2704e-09	-2.24216	Down
ILMN_1788099	25804	LSM4	878.944	185.864	0.00232734	-2.24153	Down
ILMN_1750693	6745	SSR1	789.925	167.056	0.00181212	-2.24138	Down
ILMN_1653028	1282	COL4A1	429.082	90.8404	0.00843994	-2.23985	Down
ILMN_2387636	3692	ITGB4BP	1744.72	369.441	1.24675e-06	-2.23958	Down
ILMN_1780058	8560	DEGS1	1289.73	273.251	0.0014949	-2.23878	Down
ILMN_2306565	10651	MTX2	660.924	140.128	0.00601952	-2.23774	Down
ILMN_1777881	26262	TSPAN17	1333.9	282.863	0.00217715	-2.23748	Down
ILMN_1814726	950	SCARB2	1414.83	300.405	0.00154753	-2.23564	Down
ILMN_1761721	55737	VPS35	1319.34	280.149	0.00260719	-2.23555	Down
ILMN_1815115	1537	CYC1	1906.62	405.943	1.25786e-05	-2.23167	Down
ILMN_1703564	83658	DYNLRB1	505.049	107.759	0.00157286	-2.22861	Down
ILMN_1658835	858	CAV2	371.493	79.2843	0.00749736	-2.22823	Down
ILMN_1671374	28974	C19orf53	809.476	172.896	0.00860011	-2.22708	Down
ILMN_2092756	79073	TMEM109	521.558	111.463	0.00840657	-2.22627	Down
ILMN_1665717	1968	EIF2S3	785.562	167.928	0.00641818	-2.22588	Down
ILMN_1657862	191	AHCY	1406.88	301.683	0.005238	-2.22139	Down
ILMN_1778236	5781	PTPN11	931.483	200.171	0.00564526	-2.2183	Down
ILMN_1716445	727761	LOC727761	418.561	89.9521	0.00121119	-2.21821	Down
ILMN_3292224	100131609	LOC100131609	524.887	112.844	2.48469e-05	-2.21768	Down
ILMN_1760667	84265	POLR3GL	593.422	127.589	5.05403e-07	-2.21755	Down
ILMN_1716053	204	AK2	1176.52	253.631	0.000370758	-2.21372	Down
ILMN_1782579	10989	IMMT	781.472	168.946	0.00334225	-2.20963	Down
ILMN_1800659	5236	PGM1	1543.28	333.986	0.000572331	-2.20814	Down
ILMN_2101832	55353	LAPTM4B	906.304	196.477	0.000301765	-2.20563	Down
ILMN_1795991	51493	C22orf28	690.926	149.81	0.00783353	-2.2054	Down
ILMN_1661366	5223	PGAM1	1433.75	311.772	1.02779e-07	-2.20123	Down
ILMN_2115490	400818	NBPF20	1093.31	237.931	0.00264575	-2.20009	Down
ILMN_1752351	3920	LAMP2	550.752	119.904	0.000281384	-2.19952	Down
ILMN_3304049	729500	LOC729500	911.817	198.775	0.000535924	-2.19761	Down
ILMN_1791296	23333	DPY19L1	1906.29	416.429	3.41895e-06	-2.19462	Down
ILMN_1694491	900	CCNG1	634.516	138.858	0.000580535	-2.19205	Down
ILMN_1670542	204	AK2	859.421	188.175	0.00168672	-2.19129	Down
ILMN_1806106	26354	GNL3	619.488	136.136	0.0087394	-2.18603	Down
ILMN_2096654	54939	COMMD4	593.159	130.483	1.80328e-05	-2.18456	Down
ILMN_2367191	9491	PSMF1	648.601	143.028	1.53539e-05	-2.18103	Down
ILMN_1779616	8802	SUCLG1	679.246	150.022	0.00342342	-2.17876	Down
ILMN_1758164	6781	STC1	614.298	136.117	0.000729848	-2.17409	Down
ILMN_3247064	9410	SNRNP40	418.483	92.8417	0.00385792	-2.17232	Down
ILMN_1731354	55486	PARL	585.008	130.339	1.26469e-08	-2.16619	Down
ILMN_1780036	9948	WDR1	2562.71	571.962	0.000536188	-2.16368	Down
ILMN_2121207	93343	FAM125A	535.131	119.507	0.00111728	-2.16279	Down
ILMN_1747598	6992	PPP1R11	1468.8	328.215	0.00793423	-2.16192	Down
ILMN_2324421	7296	TXNRD1	377.67	84.5451	0.00149535	-2.15933	Down
ILMN_2395043	3308	HSPA4	656.984	147.139	0.00551471	-2.15867	Down
ILMN_2309156	56937	PMEPA1	579.294	129.747	0.00817396	-2.15859	Down
ILMN_1740819	56910	STARD7	1213.43	271.78	0.0067698	-2.15859	Down
ILMN_1659936	23645	PPP1R15A	855.593	192.241	0.00582045	-2.15401	Down
ILMN_1661917	644039	LOC644039	10021.6	2252.65	1.24158e-09	-2.15341	Down
ILMN_1673944	63905	MANBAL	929.318	208.918	0.00219739	-2.15324	Down
ILMN_1744604	1535	CYBA	2849.21	640.531	5.01965e-10	-2.15322	Down
ILMN_1802456	1635	DCTD	1229.89	276.673	0.00115811	-2.15227	Down
ILMN_2057573	57488	FAM62B	1704.69	384.063	0.00260483	-2.15009	Down
ILMN_3205656	391075	LOC391075	5356.16	1207.96	8.712e-06	-2.14863	Down
ILMN_1811480	54936	ADPRHL2	359.149	81.0069	0.0031384	-2.14846	Down
ILMN_1661599	54541	DDIT4	983.233	222.103	1.61806e-08	-2.1463	Down
ILMN_1739946	79001	VKORC1	2099.41	474.324	0.000297729	-2.14604	Down
ILMN_1790472	81894	SLC25A28	818.043	185.052	0.00914928	-2.14424	Down
ILMN_2072091	221092	HNRNPUL2	404.571	91.5517	6.86124e-06	-2.14373	Down
ILMN_1670752	22889	KIAA0907	393.449	89.7644	0.000106617	-2.13196	Down
ILMN_1764323	124512	LOC124512	443.31	101.496	0.0057263	-2.1269	Down
ILMN_1790650	123811	C16orf63	411.252	94.6299	0.00460973	-2.11965	Down
ILMN_1660462	255231	MCOLN2	1010.94	232.692	0.00600565	-2.11921	Down
ILMN_1728535	22818	COPZ1	615.489	141.8	0.00179098	-2.11787	Down
ILMN_1783709	10670	RRAGA	1561.49	359.894	0.000334744	-2.11728	Down
ILMN_1665510	54206	ERRFI1	5584.83	1287.65	3.48801e-08	-2.11677	Down
ILMN_1662232	10540	DCTN2	1315.43	306.342	5.15411e-09	-2.10232	Down
ILMN_1698213	5935	RBM3	810.889	189.055	8.60457e-05	-2.1007	Down
ILMN_1733931	10016	PDCD6	1208.12	282.557	0.00210647	-2.09615	Down
ILMN_1761242	150684	COMMD1	682.495	159.896	0.00667365	-2.09368	Down
ILMN_1680967	84324	CIP29	802.646	188.455	1.50367e-06	-2.09055	Down
ILMN_1655469	10099	TSPAN3	711.573	168.003	0.00958082	-2.08252	Down
ILMN_2363065	10313	RTN3	478.5	112.985	0.000960111	-2.08238	Down
ILMN_1811551	51071	DERA	1369.08	323.658	0.00388772	-2.08066	Down
ILMN_1773493	10431	TIMM23	475.284	112.365	0.000293263	-2.0806	Down
ILMN_1691117	116092	DNTTIP1	1584.52	374.818	1.49606e-05	-2.07978	Down
ILMN_1766045	51100	SH3GLB1	1323.98	313.386	0.000663537	-2.07887	Down
ILMN_1736700	226	ALDOA	2872.53	681.456	7.64396e-08	-2.07563	Down
ILMN_2389151	7360	UGP2	951.869	226.238	0.00397419	-2.07292	Down
ILMN_1655046	10204	NUTF2	443.211	105.948	0.00202986	-2.06464	Down
ILMN_1728605	7267	TTC3	1168.2	279.555	8.76666e-07	-2.06309	Down
ILMN_3272603	58516	FAM60A	508.537	121.798	0.000308016	-2.06186	Down
ILMN_2049727	51526	C20orf111	551.472	132.282	2.37427e-06	-2.05967	Down
ILMN_2357438	6790	AURKA	610.564	147.232	0.00495323	-2.05205	Down
ILMN_2366041	81618	ITM2C	581.151	140.423	0.000366275	-2.04913	Down
ILMN_1685397	3675	ITGA3	1457.82	353.303	7.85327e-05	-2.04484	Down
ILMN_2112301	10589	DRAP1	1156.64	281.244	0.00797467	-2.04005	Down
ILMN_1769810	10550	ARL6IP5	1476.42	359.687	4.24152e-05	-2.03729	Down
ILMN_1735220	858	CAV2	516.406	126.108	0.00909111	-2.03385	Down
ILMN_1657797	9158	FIBP	1104.57	272.144	0.00264825	-2.02104	Down
ILMN_2342240	4247	MGAT2	485.853	119.982	0.00781221	-2.01771	Down
ILMN_1680782	219988	PATL1	487.972	120.612	0.0061084	-2.01643	Down
ILMN_3280565	389342	LOC389342	544.351	134.562	1.81504e-05	-2.01626	Down
ILMN_2115125	1490	CTGF	1477.44	365.988	3.30918e-05	-2.01324	Down
ILMN_1651735	10618	TGOLN2	1099.23	272.404	0.000452656	-2.01268	Down
ILMN_1746704	81603	TRIM8	1185.97	294.51	0.00511225	-2.00967	Down
ILMN_1715698	440400	MGC71993	1398.11	347.55	0.000965224	-2.00819	Down
ILMN_1742450	6892	TAPBP	569.558	141.677	0.00494898	-2.00724	Down
ILMN_1807206	115817	DHRS1	818.848	203.807	5.38961e-05	-2.00639	Down
ILMN_2130411	10945	KDELR1	1810.86	451.698	0.000792426	-2.00324	Down
ILMN_1742789	9404	LPXN	619.786	155.237	0.000904339	-1.9973	Down
ILMN_1777066	60491	NIF3L1	522.054	130.836	0.00554129	-1.99644	Down
ILMN_1658053	83658	DYNLRB1	1509.47	378.724	2.83275e-07	-1.99482	Down
ILMN_2347234	3276	PRMT1	696.073	175.792	0.000220652	-1.98537	Down
ILMN_1751345	1174	AP1S1	651.515	164.833	0.000727469	-1.9828	Down
ILMN_1784602	1026	CDKN1A	1078.78	274.517	9.71164e-07	-1.97442	Down
ILMN_1732967	170954	KIAA1949	803.118	204.606	1.14311e-08	-1.97276	Down
ILMN_1735367	51170	HSD17B11	1006.27	257.463	0.00132981	-1.96659	Down
ILMN_3227529	729236	LOC729236	495.78	127.13	0.0013256	-1.96339	Down
ILMN_3244248	645203	TMEM14D	1155.41	297.308	9.36869e-06	-1.95837	Down
ILMN_1753468	967	CD63	1700.82	438.004	1.89628e-07	-1.95722	Down
ILMN_1773760	10606	PAICS	2245.03	578.245	0.00688409	-1.95698	Down
ILMN_1786532	10175	CNIH	1325.96	341.732	0.000243264	-1.9561	Down
ILMN_1652333	79672	FN3KRP	470.409	121.287	0.00224141	-1.95548	Down
ILMN_1655163	8428	STK24	1256.87	325.495	0.000978694	-1.94912	Down
ILMN_1779258	644774	LOC644774	2124.13	550.409	7.63861e-07	-1.94829	Down
ILMN_1724658	664	BNIP3	2600.85	673.975	9.791e-12	-1.94822	Down
ILMN_3202024	392437	LOC392437	1308.7	339.248	0.000514375	-1.94772	Down
ILMN_1685097	51008	ASCC1	412.247	106.988	0.0084526	-1.94606	Down
ILMN_3208715	440063	LOC440063	695.197	180.462	0.000127879	-1.94572	Down
ILMN_1671404	6840	SVIL	1602.41	416.397	2.90861e-06	-1.94421	Down
ILMN_1783636	1337	COX6A1	1453.58	378.75	0.00575676	-1.94029	Down
ILMN_1686750	10724	MGEA5	1342.1	352.234	0.00693532	-1.92988	Down
ILMN_1670145	1687	DFNA5	745.017	195.937	0.000740716	-1.92688	Down
ILMN_2363658	7837	PXDN	2043.42	538.015	0.00858344	-1.92526	Down
ILMN_3304898	92755	LOC92755	2251.8	596.754	5.89456e-06	-1.91587	Down
ILMN_2341467	55486	PARL	538.119	143.325	3.02246e-06	-1.90863	Down
ILMN_1680453	81618	ITM2C	610.895	163.045	0.00797467	-1.90566	Down
ILMN_3288717	392437	LOC392437	561.879	150.161	0.00025259	-1.90375	Down
ILMN_1730734	374882	TMEM205	1230.04	329.514	0.00272856	-1.90029	Down
ILMN_3227023	84973	SNHG7	551.761	148.039	0.00484099	-1.89807	Down
ILMN_1691570	29081	METTL5	811.98	218.436	1.02307e-05	-1.89424	Down
ILMN_1712305	79901	CYBRD1	401.897	108.173	0.00702151	-1.89348	Down
ILMN_1697220	4907	NT5E	2495.27	675.237	9.00928e-06	-1.88573	Down
ILMN_2184373	3576	IL8	3086.48	836.512	0.00735586	-1.88351	Down
ILMN_3217815	646294	LOC646294	8290.12	2248.44	6.0447e-11	-1.88247	Down
ILMN_1682781	8463	TEAD2	679.771	184.895	9.71632e-06	-1.87834	Down
ILMN_3291709	402175	LOC402175	1707.84	465.856	7.26533e-05	-1.87422	Down
ILMN_1798728	8725	C19orf2	1116.36	305.051	0.000888356	-1.87167	Down
ILMN_3239576	100216001	LOC100216001	1116.69	305.551	2.62477e-05	-1.86974	Down
ILMN_1660577	517	ATP5G2	2807.21	769.512	2.19239e-09	-1.86712	Down
ILMN_3243705	23042	PDXDC1	311.656	85.8	0.00492036	-1.86091	Down
ILMN_2360710	7168	TPM1	551.524	152.173	0.00703655	-1.85771	Down
ILMN_1658802	200185	KRTCAP2	1494.74	412.608	2.68929e-05	-1.85705	Down
ILMN_1681972	51249	TMEM69	459.272	126.826	0.000514281	-1.85649	Down
ILMN_2415235	1454	CSNK1E	1887.41	524.877	0.00211746	-1.84636	Down
ILMN_2277676	2067	ERCC1	606.045	168.595	0.00669293	-1.84586	Down
ILMN_2262288	1937	EEF1G	10216.3	2861.66	7.53511e-09	-1.83595	Down
ILMN_1759948	286140	RNF5P1	800.608	224.368	0.000343585	-1.83523	Down
ILMN_2211950	390284	SRP14P1	1571.08	441.654	0.00767207	-1.83077	Down
ILMN_2134555	51133	KCTD3	424.948	119.518	0.00535996	-1.83006	Down
ILMN_2290618	9117	SEC22C	425.623	119.874	0.00868151	-1.82806	Down
ILMN_1715994	9146	HGS	1781.24	501.693	0.00737372	-1.82801	Down
ILMN_1792681	79080	CCDC86	359.809	101.461	0.00178861	-1.82631	Down
ILMN_1745075	6175	RPLP0	2703.46	767.51	0.000117629	-1.81655	Down
ILMN_2145116	340061	TMEM173	374.732	106.759	0.00903672	-1.81149	Down
ILMN_1738579	7428	VHL	359.54	102.538	0.00693446	-1.80998	Down
ILMN_1667260	5595	MAPK3	426.577	121.665	0.000232209	-1.8099	Down
ILMN_1758311	10276	NET1	1846.02	526.865	0.00480307	-1.80891	Down
ILMN_1770803	663	BNIP2	470.019	135.162	0.00161938	-1.79803	Down
ILMN_1651254	4026	LPP	1072.68	309.214	0.00575676	-1.79455	Down
ILMN_1685703	8309	ACOX2	1006.95	290.537	0.000183248	-1.7932	Down
ILMN_1753279	10949	HNRNPA0	1191.3	343.951	0.000333858	-1.79226	Down
ILMN_2316806	51389	RWDD1	1661.27	480.993	0.00173775	-1.7882	Down
ILMN_1690268	11100	HNRPUL1	1646.13	479.577	0.00339631	-1.77925	Down
ILMN_2087528	51692	CPSF3	556.812	162.587	0.00735586	-1.77598	Down
ILMN_1812478	9326	ZNHIT3	1444.87	424.724	9.50246e-07	-1.76634	Down
ILMN_1663866	7045	TGFBI	4368.64	1286.82	0.000124155	-1.76337	Down
ILMN_3210741	642956	LOC642956	522.461	154.176	0.00101213	-1.76074	Down
ILMN_1663002	30968	STOML2	1819.5	537.996	0.000215954	-1.75788	Down
ILMN_2258774	84545	MRPL43	942.135	278.918	0.00254992	-1.75609	Down
ILMN_1811615	1314	COPA	1589.73	471.732	0.00110044	-1.75274	Down
ILMN_1672662	6574	SLC20A1	2574.35	764.907	1.17134e-05	-1.75085	Down
ILMN_1787410	3692	EIF6	1584.1	471.572	0.00262323	-1.74811	Down
ILMN_2082209	84969	C20orf100	1497.46	446.672	0.000427568	-1.74523	Down
ILMN_1749009	25996	REXO2	2012.02	601.706	0.00205454	-1.74151	Down
ILMN_1676611	29085	PHPT1	1024.49	306.742	0.000786482	-1.7398	Down
ILMN_1667476	4055	LTBR	416.772	125.183	0.00248198	-1.73521	Down
ILMN_3213568	402112	LOC402112	3138.25	942.782	2.53835e-07	-1.73497	Down
ILMN_1712944	166	AES	874.142	263.156	0.0061341	-1.73195	Down
ILMN_1792825	10425	ARIH2	419.299	126.24	0.000589884	-1.73181	Down
ILMN_2249473	10558	SPTLC1	1153.69	347.709	0.00495323	-1.73031	Down
ILMN_1733176	3987	LIMS1	664.315	200.359	0.00838431	-1.72928	Down
ILMN_1713369	23521	RPL13A	7177.14	2171.59	8.06499e-06	-1.72466	Down
ILMN_3294335	646294	LOC646294	6468.46	1959.09	3.31025e-07	-1.72324	Down
ILMN_1759359	91408	BTF3L4	369.306	111.919	0.00921787	-1.72236	Down
ILMN_1707627	7167	TPI1	6827.92	2072.41	7.22279e-06	-1.72014	Down
ILMN_1660199	10449	ACAA2	326.544	99.135	0.00230901	-1.71981	Down
ILMN_1785268	965	CD58	545.142	165.541	0.000582566	-1.71944	Down
ILMN_1669966	374291	NDUFS7	893.033	271.187	0.00498402	-1.71942	Down
ILMN_1677919	51292	GMPR2	705.076	214.711	0.00155955	-1.71538	Down
ILMN_1793220	2618	GART	313.589	95.7146	0.00607886	-1.71206	Down
ILMN_1751708	9445	ITM2B	2098.05	640.803	0.000113461	-1.71109	Down
ILMN_1720745	645385	LOC645385	5401.33	1657.54	5.14774e-06	-1.70428	Down
ILMN_3215712	100131609	LOC100131609	4776.31	1468.62	1.51622e-05	-1.70143	Down
ILMN_1727194	813	CALU	644.246	198.119	0.00374667	-1.70124	Down
ILMN_3239629	729679	LOC729679	4211.77	1298.77	5.92735e-07	-1.69729	Down
ILMN_3216336	285741	LOC285741	1206.36	372.122	3.31329e-06	-1.69681	Down
ILMN_1806937	29086	C19orf62	939.88	290.099	0.00770942	-1.69593	Down
ILMN_1719316	23423	TMED3	1908.21	589.264	9.45792e-06	-1.69523	Down
ILMN_3306215	729926	LOC729926	2439.39	753.796	0.000288233	-1.69427	Down
ILMN_1815308	6382	SDC1	721.899	223.699	0.00110673	-1.69024	Down
ILMN_2316173	1174	AP1S1	839.444	261.635	0.00475202	-1.68188	Down
ILMN_1704305	51388	NIP7	1165.88	364.112	0.00517474	-1.67896	Down
ILMN_1748546	4735	SEPT2	2380.08	746.189	1.4296e-05	-1.6734	Down
ILMN_3240222	157285	PRAGMIN	400.527	125.718	0.00809295	-1.67171	Down
ILMN_2404539	29058	C20orf30	1204.33	380.796	0.000138741	-1.66114	Down
ILMN_3284584	390345	LOC390345	3669.46	1160.7	1.63305e-05	-1.66058	Down
ILMN_1774584	51374	C2orf28	2087.69	661.745	0.00438476	-1.65756	Down
ILMN_2339627	11316	COPE	571.886	181.482	0.000323734	-1.6559	Down
ILMN_1774334	192286	HIGD2A	2146.47	681.402	2.34251e-06	-1.65539	Down
ILMN_1741727	25797	QPCT	462.87	146.951	0.0035856	-1.65527	Down
ILMN_1791332	539	ATP5O	1959.11	622.286	5.39138e-06	-1.65455	Down
ILMN_1661886	328	APEX1	2408.18	765.99	0.000595708	-1.65254	Down
ILMN_3289100	647285	LOC647285	1256.28	400.447	0.00100966	-1.64948	Down
ILMN_3217172	286444	LOC286444	7945.54	2532.97	9.35701e-07	-1.64932	Down
ILMN_1789186	79991	OBFC1	383.307	122.251	0.00122817	-1.64865	Down
ILMN_1814998	440915	FKSG30	3703.62	1182.08	5.17201e-05	-1.64761	Down
ILMN_1756541	10608	MXD4	469.125	149.812	0.00121538	-1.64681	Down
ILMN_2234016	2500	FTHL7	7601.53	2434.31	2.12772e-05	-1.64278	Down
ILMN_1784227	10445	MCRS1	597.337	191.349	0.0088514	-1.64234	Down
ILMN_1685538	158345	LOC158345	5116.07	1658.19	7.14722e-05	-1.62543	Down
ILMN_2400292	5601	MAPK9	356.162	115.671	0.00415757	-1.62251	Down
ILMN_1775677	219743	TYSND1	361.863	117.916	0.00803229	-1.61768	Down
ILMN_1737074	440589	LOC440589	18892.7	6174.72	3.70244e-06	-1.61338	Down
ILMN_1690706	6629	SNRPB2	1571.18	514.273	0.00501054	-1.61124	Down
ILMN_3278506	148430	LOC148430	3688.94	1208.82	0.00158587	-1.6096	Down
ILMN_1661799	25994	HIGD1A	830.625	272.796	0.000190512	-1.60638	Down
ILMN_3201445	728128	LOC728128	8116.38	2675.37	1.80183e-05	-1.6011	Down
ILMN_1792078	55905	RNF114	1201.85	396.44	0.00487896	-1.60009	Down
ILMN_1769566	64422	ATG3	507.544	168.075	0.00741451	-1.59443	Down
ILMN_1711766	6500	SKP1A	962.123	318.806	0.00292855	-1.59354	Down
ILMN_1697694	537	ATP6AP1	962.403	319.232	0.00962932	-1.59203	Down
ILMN_2215545	84319	C3orf26	502.088	166.702	0.00915234	-1.59067	Down
ILMN_3200384	441013	LOC441013	11400.1	3787.16	6.92109e-06	-1.58986	Down
ILMN_3304555	728324	LOC728324	544.307	180.936	0.00823879	-1.58894	Down
ILMN_2335718	3182	HNRNPAB	1442.36	480.481	0.00521888	-1.58588	Down
ILMN_3192791	4670	HNRNPM	1227.53	409.137	0.00881085	-1.58511	Down
ILMN_2382990	3098	HK1	2641.79	880.901	3.66237e-05	-1.58446	Down
ILMN_1688702	9867	PJA2	1713.44	572.293	0.00620552	-1.58207	Down
ILMN_2079386	6146	RPL22	2155.18	723.508	0.00102096	-1.57473	Down
ILMN_1765684	125988	C19orf70	1613.68	543.577	0.00276562	-1.5698	Down
ILMN_1737738	55967	NDUFA12	2520.67	851.514	0.000109202	-1.56571	Down
ILMN_2334587	3183	HNRNPC	456.323	154.388	0.00161533	-1.5635	Down
ILMN_3176403	2508	FTHL16	8894.08	3016.18	2.10902e-05	-1.56012	Down
ILMN_1724250	2896	GRN	451.233	153.413	0.00294249	-1.55645	Down
ILMN_1737163	83442	SH3BGRL3	1059.8	360.373	0.000412797	-1.55623	Down
ILMN_2386530	6176	RPLP1	9220.32	3142.42	0.00121749	-1.55294	Down
ILMN_3201115	440043	LOC440043	6785.24	2317.12	9.81908e-06	-1.55007	Down
ILMN_2059505	10776	ARPP19	560.346	191.539	0.00823879	-1.54868	Down
ILMN_1772713	9790	BMS1	958.448	328.228	0.00651224	-1.546	Down
ILMN_1699208	4673	NAP1L1	1871.01	641.198	0.000273972	-1.54497	Down
ILMN_1674522	25994	HIGD1A	1671.37	573.455	8.37223e-05	-1.54328	Down
ILMN_1800739	10653	SPINT2	2866	986.886	0.000327834	-1.53808	Down
ILMN_2319994	6122	RPL3	11934	4129.81	4.64329e-05	-1.53092	Down
ILMN_1706426	11034	DSTN	2327.93	806.18	0.00135231	-1.52988	Down
ILMN_2339779	529	ATP6V1E1	1631.76	566.027	0.00186069	-1.52748	Down
ILMN_3238633	54949	SDHAF2	910.178	316.06	0.00376538	-1.52595	Down
ILMN_3243011	641844	LOC641844	645.047	224.549	0.00668497	-1.52238	Down
ILMN_3254492	100129650	LOC100129650	907.986	316.25	0.000128139	-1.5216	Down
ILMN_1778374	682	BSG	2020.97	706.302	4.55854e-05	-1.51669	Down
ILMN_3281599	642741	LOC642741	10588	3707.32	0.000112015	-1.51398	Down
ILMN_2305544	1622	DBI	2277.32	802.916	0.00018587	-1.50401	Down
ILMN_2081335	55744	C7orf44	1658.29	585.029	0.000253105	-1.50312	Down
ILMN_1658289	84058	WDR54	1891.37	667.383	0.00041493	-1.50284	Down
ILMN_2307740	4179	CD46	571.319	201.721	0.00835056	-1.50194	Down
ILMN_2356672	8890	EIF2B4	560.159	197.844	0.00500315	-1.50147	Down
ILMN_1777296	60	ACTB	15089	5335.19	0.000202985	-1.49988	Down
ILMN_1802251	754	PTTG1IP	1234.54	436.816	0.00615653	-1.49887	Down
ILMN_1776021	7458	EIF4H	2231.14	789.999	0.000389596	-1.49786	Down
ILMN_2152131	60	ACTB	13593.1	4817.63	0.000272682	-1.49648	Down
ILMN_3234436	100132528	LOC100132528	2507.84	888.987	0.00122467	-1.49621	Down
ILMN_1674658	170712	COX7B2	1467.34	520.447	0.00665258	-1.49538	Down
ILMN_3243291	100133372	LOC100133372	4525.67	1605.53	0.00635117	-1.49508	Down
ILMN_1704961	71	ACTG1	11217.6	3998.52	0.00176241	-1.48822	Down
ILMN_2354515	25915	NDUFAF3	2143.76	764.415	0.00312146	-1.48771	Down
ILMN_2179837	8815	BANF1	2266.31	811.857	0.000514281	-1.48105	Down
ILMN_1687978	22822	PHLDA1	2878.26	1033.94	0.000535924	-1.47704	Down
ILMN_1777765	60314	C12orf10	862.92	310.231	0.000883622	-1.47589	Down
ILMN_2145518	55863	TMEM126B	1134.1	408.178	0.00295365	-1.47427	Down
ILMN_1746588	6888	TALDO1	2275.29	821.721	0.000460942	-1.46933	Down
ILMN_1691237	10486	CAP2	872.081	315.315	0.000514375	-1.46767	Down
ILMN_1662619	7035	TFPI	2619.81	947.492	0.00193116	-1.46728	Down
ILMN_2365465	7494	XBP1	1285.79	465.103	0.00344132	-1.46703	Down
ILMN_1812191	113246	C12orf57	1721.38	623.229	0.00219739	-1.46573	Down
ILMN_1662426	1175	AP2S1	2947.48	1067.59	9.58044e-05	-1.46512	Down
ILMN_1727458	3065	HDAC1	2571.37	931.744	0.00840935	-1.46453	Down
ILMN_1684391	5351	PLOD1	1952.89	709.929	0.00140494	-1.45987	Down
ILMN_2038778	2597	GAPDH	14816.8	5390.93	9.5344e-05	-1.45862	Down
ILMN_1676091	388275	LOC388275	1195.88	435.696	0.00131784	-1.45669	Down
ILMN_1655497	1975	EIF4B	2213.03	807.936	0.00019289	-1.45371	Down
ILMN_1750636	400156	RPS26L	2399.37	876.644	0.00103808	-1.45259	Down
ILMN_1666384	151579	LOC151579	1050.33	384.336	0.00615653	-1.45041	Down
ILMN_3209193	644191	LOC644191	1868.99	684.903	0.000566384	-1.44829	Down
ILMN_1660021	10226	M6PRBP1	3398.22	1245.48	0.000243342	-1.44808	Down
ILMN_1767766	7001	PRDX2	1246.07	458.047	0.00756278	-1.44381	Down
ILMN_1751726	649049	LOC649049	8430.64	3112.14	0.00142304	-1.43774	Down
ILMN_1761797	1476	CSTB	2898.28	1071.73	0.000727039	-1.43525	Down
ILMN_1714820	3688	ITGB1	1812.96	671.615	0.000703033	-1.43264	Down
ILMN_1701875	7791	ZYX	1134.88	421.424	0.000502892	-1.4292	Down
ILMN_1686664	4502	MT2A	11362	4221.66	0.000266934	-1.42833	Down
ILMN_1700306	132299	OCIAD2	2494.27	926.933	0.00131918	-1.42808	Down
ILMN_1769191	2778	GNAS	5996.42	2228.81	0.000314126	-1.42783	Down
ILMN_3287583	648390	LOC648390	3478.16	1292.91	0.000792426	-1.4277	Down
ILMN_2187718	10063	COX17	1493.61	555.504	0.000690486	-1.42694	Down
ILMN_1672878	29	ABR	2028.65	754.873	0.00486417	-1.42622	Down
ILMN_1718988	9802	DAZAP2	1797.82	669.5	0.00275598	-1.42509	Down
ILMN_1801928	7534	YWHAZ	6148.35	2291.33	0.000323734	-1.42401	Down
ILMN_1696708	51637	C14orf166	1919.68	715.823	0.00872721	-1.42319	Down
ILMN_1755749	5230	PGK1	4180.57	1559.19	0.00151353	-1.42291	Down
ILMN_1657796	3925	STMN1	612.195	228.999	0.00243178	-1.41865	Down
ILMN_1674661	1153	CIRBP	3081.46	1160.51	0.00224686	-1.40886	Down
ILMN_1741148	226	ALDOA	2646.65	997.742	0.000455537	-1.40743	Down
ILMN_1771815	51507	C20orf43	1799.19	679.084	0.000884595	-1.40568	Down
ILMN_3243700	6202	RPS8	11329.3	4282.83	0.000390177	-1.40343	Down
ILMN_2214144	57045	TWSG1	1248.39	472.794	0.00282236	-1.40079	Down
ILMN_1714158	5445	PON2	530.56	201.144	0.00534224	-1.39929	Down
ILMN_1749447	6203	RPS9	7101.8	2693.4	0.00158836	-1.39876	Down
ILMN_2312897	1716	DGUOK	1317.19	501.055	0.00911273	-1.39443	Down
ILMN_2165753	649853	HLA-A29.1	1706.32	652.177	0.00367149	-1.38755	Down
ILMN_1772888	645688	LOC645688	3334.14	1278.33	0.00137956	-1.38305	Down
ILMN_3298037	728453	LOC728453	8380.71	3228.43	0.000502892	-1.37624	Down
ILMN_1700025	732007	LOC732007	2358.95	911.009	0.00359021	-1.37261	Down
ILMN_1733538	6001	RGS10	1396.94	539.651	0.000956067	-1.37218	Down
ILMN_1343295	2597	GAPDH	10425.6	4036.87	0.000530808	-1.36882	Down
ILMN_1691611	645436	LOC645436	3919.51	1519.11	0.00604319	-1.36745	Down
ILMN_2182750	1653	DDX1	1266.45	492.239	0.00312742	-1.36336	Down
ILMN_2354140	51126	NAT5	763.211	296.867	0.00616863	-1.36227	Down
ILMN_2218277	6187	RPS2	9966.84	3880.25	0.000777587	-1.36099	Down
ILMN_2181191	7167	TPI1	4751.42	1850.39	0.00211978	-1.36053	Down
ILMN_1749109	5660	PSAP	7142.43	2782.76	0.00122314	-1.3599	Down
ILMN_1859946			776.387	303.341	0.00782419	-1.35584	Down
ILMN_1661755	64855	FAM129B	3011.06	1176.55	0.00376472	-1.35571	Down
ILMN_1673215	5093	PCBP1	3321.76	1298.07	0.000938586	-1.35558	Down
ILMN_1652768	440589	LOC440589	18753.5	7329.12	0.000654146	-1.35544	Down
ILMN_2355559	5660	PSAP	7382.98	2889.19	0.000691374	-1.35354	Down
ILMN_3236377	205327	C2orf69	1640.84	642.701	0.00701817	-1.35221	Down
ILMN_1659095	644029	LOC644029	13326	5231.16	0.00210368	-1.34904	Down
ILMN_1807074	4282	MIF	5929.31	2337.3	0.0055352	-1.34302	Down
ILMN_1797776	11098	PRSS23	2910.69	1147.42	0.00580571	-1.34297	Down
ILMN_1775566	476	ATP1A1	1238.28	488.299	0.00177599	-1.3425	Down
ILMN_1803180	9588	PRDX6	1748.31	690.551	0.00159765	-1.34014	Down
ILMN_2058251	7431	VIM	9149.93	3616.75	0.000914737	-1.33907	Down
ILMN_1734895	113402	SFT2D1	1377.93	546.339	0.00983099	-1.33464	Down
ILMN_1726647	650646	LOC650646	6268.31	2487.45	0.00159309	-1.33341	Down
ILMN_2391765	50854	C6orf48	3855.75	1531.73	0.00231847	-1.33185	Down
ILMN_1760347	5552	SRGN	1198.28	476.641	0.00498984	-1.33	Down
ILMN_3279277	387930	LOC387930	18675.9	7430	0.00210647	-1.32974	Down
ILMN_3207020	388556	LOC388556	7020.67	2794.8	0.00341163	-1.32886	Down
ILMN_1732074	648210	LOC648210	7981.4	3180.23	0.00295904	-1.32751	Down
ILMN_3291098	643531	LOC643531	8663.25	3455.87	0.00265656	-1.32586	Down
ILMN_1756982	1192	CLIC1	4560.93	1822.63	0.00237954	-1.32331	Down
ILMN_3219643	401537	LOC401537	5264.66	2104.46	0.00202952	-1.32289	Down
ILMN_1709795	5880	RAC2	3075.47	1229.69	0.00146631	-1.32251	Down
ILMN_3198247	388707	LOC388707	3648.23	1458.85	0.0088386	-1.32236	Down
ILMN_3220888	440086	RPS6P1	2809.14	1124.39	0.00657881	-1.32098	Down
ILMN_1667711	11145	HRASLS3	869.994	348.357	0.00892142	-1.32044	Down
ILMN_3225211	729742	LOC729742	4538.18	1821.99	0.00277709	-1.3166	Down
ILMN_2356284	5204	PFDN5	2166.23	872.95	0.00625992	-1.31121	Down
ILMN_1807106	3939	LDHA	8383.84	3378.71	0.00376472	-1.31114	Down
ILMN_1771599	5352	PLOD2	1997.9	805.371	0.00384191	-1.31076	Down
ILMN_2132100	171489	SPANXE	1307.78	530.49	0.00729827	-1.30172	Down
ILMN_3241758	728378	POTEF	5530.64	2245.17	0.00639769	-1.30062	Down
ILMN_3188984	441951	C20orf199	3618.46	1469.95	0.00305913	-1.29961	Down
ILMN_2112417	5223	PGAM1	3179.7	1302.83	0.00360619	-1.28725	Down
ILMN_3219764	441506	LOC441506	3576.68	1468.44	0.00266079	-1.28434	Down
ILMN_2308582	1727	CYB5R3	4933.14	2025.74	0.00263268	-1.28406	Down
ILMN_1677237	645345	CHCHD9	2096.66	864.14	0.00410705	-1.27875	Down
ILMN_1732328	646200	LOC646200	5799.69	2391.99	0.00270207	-1.27776	Down
ILMN_1744517	2799	GNS	1729.07	713.332	0.00392963	-1.27735	Down
ILMN_1711566	7076	TIMP1	3067.76	1268.67	0.00439879	-1.27386	Down
ILMN_1762747	6138	RPL15	3933.17	1627.21	0.003651	-1.27329	Down
ILMN_1812312	4724	NDUFS4	1517.1	630.895	0.00638989	-1.26584	Down
ILMN_1801616	2012	EMP1	2036.78	847.146	0.00534672	-1.26561	Down
ILMN_1707810	6193	RPS5	9861.84	4105.13	0.00384191	-1.26443	Down
ILMN_1680437	731096	LOC731096	10435	4347.61	0.00540199	-1.26313	Down
ILMN_1802252	2597	GAPDH	4652.31	1942.19	0.00356489	-1.26027	Down
ILMN_3231390	55651	NHP2	2315.34	968.641	0.00479497	-1.25719	Down
ILMN_1703433	57048	PLSCR3	2369.85	992.856	0.00801423	-1.25514	Down
ILMN_3204210	284393	LOC284393	13804.2	5804.56	0.00554124	-1.24985	Down
ILMN_3226291	728820	LOC728820	1487.73	625.878	0.00704351	-1.24916	Down
ILMN_3249748	3939	LDHA	11280.8	4759.7	0.00782773	-1.24492	Down
ILMN_2219134	6209	RPS15	11864.3	5020.53	0.00762016	-1.24072	Down
ILMN_3241136	440400	RNASEK	1374.88	582.799	0.00859293	-1.23824	Down
ILMN_2174394	64210	MMS19L	1300.86	551.626	0.00890774	-1.23771	Down
ILMN_2154671	1340	COX6B1	3058.07	1297.02	0.00586786	-1.23742	Down
ILMN_1750800	48	ACO1	2047.54	868.567	0.00975626	-1.23718	Down
ILMN_1798581	84515	MCM8	3543.22	1512.44	0.00727731	-1.22818	Down
ILMN_1659762	689	BTF3	5039.9	2152.47	0.00767211	-1.2274	Down
ILMN_2103295	10412	TINP1	1828.38	785.061	0.00868569	-1.21969	Down
ILMN_3211079	148430	LOC148430	15291.5	6575.73	0.00671177	-1.21751	Down
ILMN_1685088	25873	RPL36	8484.13	3657.09	0.00720424	-1.21407	Down
ILMN_1660832	285053	LOC285053	7471.31	3221.54	0.00711157	-1.21361	Down
ILMN_1657283	54890	ALKBH5	3281.3	1416.76	0.00903129	-1.21168	Down
ILMN_1701832	6143	RPL19	12332.1	5334.69	0.00983561	-1.20894	Down
ILMN_1699015	3020	H3F3A	5055.87	18860.2	6.96185e-34	1.89932	Up
