# Supplementary material for: A New Mouse Model for the Study of Human Breast Cancer Metastasis
Source: PLoS One. 2012 Oct 31;7(10):e47995. doi: 10.1371/journal.pone.0047995 (PMC3485320; doi:10.1371/journal.pone.0047995)
Supplement: Table S7 — Transcripts differentially expressed (p<0.01) in MDA-MB-436 lymph node metastases compared to primary mammary fat pad tumor xenografts in NSG mice (total 258). (XLSX) [file pone.0047995.s007.xlsx]

## Sheet: Table S7
Summary
Experiment	Illumina Microarray
Species	Human
Analysis software	Genome Studio v2011.1
Analysis module	Gene Expression v1.9
Normalization	Quantile
Background subtraction	Yes
Error model	Illumina custom with Benjamini-Hochberg FDR correction
Content Descriptor	HumanHT-12_V4_0_R2_15002873_B.bgx
Genome build	RefSeq Rel 38
Detection pvalue filter	0.05
Differential pvalue filter	0.01
Column descriptions
ProbeID	Illumina probe identifier
GeneID	Entrez gene identifier
Symbol	Official gene symbol
Group1_Signal	Average signal for samples in Group 1
Group2_Signal	Average signal for samples in Group 2
FDR corrected DiffPval	FDR corrected pvalue for differential expression call
log2FoldChange	log2(Group2_Signal/Group1_Signal)
Regulation	Up if log2FoldChange is positive, Down if log2FoldChange is negative
Group 1	Group 2	Filter	#Up-regulated probes	#Down-regulated probes	#Total
MDA436 primary tumor	MDA436 lymph node mets	pvalue 0.01	106	152	258
Article title: A new mouse model for the study of human breast cancer metastasis.
Journal: PLOS ONE
Authors:Elizabeth Iorns, Katherine Drews-Elger, Toby M. Ward, Sonja Dean, Jennifer Clarke, Deborah Berry, Dorraya El Ashry and Marc Lippman
Affiliation: University of Miami Miller School of Medicine, Miami, FL, 33136, USA
Corresponding author email address: mlippman@med.miami.edu
Table S7
Transcripts differentially expressed (p<0.01) in MDA-MB-436 lymph node metastases compared to primary mammary fat pad tumor (total 258)
ProbeID	GeneID	Symbol	PrimaryTumor_Signal	LymphNodeMets_Signal	FDR corrected DiffPval	log2FoldChange	Regulation
ILMN_1720048	6347	CCL2	1821.53	345.986	1.97419e-07	-2.39636	Down
ILMN_1767556	11067	C10orf10	104.873	20.5277	0.0029605	-2.353	Down
ILMN_1708934	133	ADM	1226.48	251.106	0.000267459	-2.28815	Down
ILMN_3238435	677800	SNORA12	439.665	117.418	2.42686e-13	-1.90475	Down
ILMN_1782050	1052	CEBPD	182.673	49.4049	0.000838337	-1.88654	Down
ILMN_1695880	4015	LOX	471.454	132.363	1.97277e-05	-1.83262	Down
ILMN_1659990	29923	C7orf68	269.725	77.8289	2.89689e-11	-1.79311	Down
ILMN_1801246	8519	IFITM1	334.26	99.3845	0.00719658	-1.74988	Down
ILMN_1661599	54541	DDIT4	983.233	307.059	0.000912983	-1.67902	Down
ILMN_3244583	114915	NCRNA00219	485.011	160.306	0.00430977	-1.59718	Down
ILMN_1654609	114915	TIGA1	734.569	250.375	8.152e-09	-1.55281	Down
ILMN_1723912	10964	IFI44L	445.171	160.444	0.00464817	-1.47229	Down
ILMN_1768534	8553	BHLHB2	1127.67	423.884	0.00740016	-1.41161	Down
ILMN_2408572	6038	RNASE4	328.367	126.993	5.10499e-05	-1.37056	Down
ILMN_1775708	6515	SLC2A3	1326.95	516.63	0.000404155	-1.36092	Down
ILMN_1776602	6038	RNASE4	393.922	158.326	1.96021e-07	-1.31502	Down
ILMN_3268697	100129882	LOC100129882	260.484	104.978	4.97727e-05	-1.3111	Down
ILMN_1671928	5627	PROS1	459.067	193.167	0.00432203	-1.24886	Down
ILMN_1698213	5935	RBM3	810.889	343.518	0.00163253	-1.23912	Down
ILMN_3251737	1915	EEF1A1	405.344	172.588	0.00173413	-1.23182	Down
ILMN_1778401	3106	HLA-B	1347.25	574.823	2.42686e-13	-1.22883	Down
ILMN_2151281	23710	GABARAPL1	207.103	90.915	0.00490646	-1.18776	Down
ILMN_1742427	51082	POLR1D	140.711	62.392	0.00157693	-1.1733	Down
ILMN_2151056	119032	C10orf32	220.834	98.3142	0.00696177	-1.16749	Down
ILMN_1651429	140606	SELM	339.816	151.617	4.98411e-12	-1.16432	Down
ILMN_1659027	6513	SLC2A1	1183.35	537.608	0.00232111	-1.13825	Down
ILMN_1736700	226	ALDOA	2872.53	1330.8	0.000525731	-1.11003	Down
ILMN_1792455	25907	TMEM158	1203.13	569.515	0.00584372	-1.07899	Down
ILMN_3202591	440311	LOC440311	248.404	119.625	6.6298e-06	-1.05417	Down
ILMN_2063168	7851	MALL	236.401	114.335	1.05225e-07	-1.04797	Down
ILMN_1773154	4792	NFKBIA	2075.58	1035	4.98332e-07	-1.00389	Down
ILMN_1676361	58504	ARHGAP22	182.789	92.6923	0.0037751	-0.979657	Down
ILMN_3188984	441951	C20orf199	3618.46	1861.32	4.08286e-08	-0.959052	Down
ILMN_1703955	114907	FBXO32	132.554	69.3427	0.0013812	-0.934763	Down
ILMN_2080158	155019	FAM10A7	226.73	120.261	8.11487e-06	-0.914804	Down
ILMN_2239754	3437	IFIT3	283.45	150.459	6.08263e-05	-0.913724	Down
ILMN_3227023	84973	SNHG7	551.761	292.889	0.00405961	-0.913687	Down
ILMN_1771333	961	CD47	277.992	148.16	0.0066386	-0.907893	Down
ILMN_1703108	9246	UBE2L6	202.063	109.428	7.11799e-05	-0.884819	Down
ILMN_2366719	55968	NSFL1C	125.193	68.4048	0.00810729	-0.871983	Down
ILMN_1658835	858	CAV2	371.493	206.678	0.000623127	-0.845954	Down
ILMN_1734543	5791	PTPRE	289.713	161.346	0.00902828	-0.844465	Down
ILMN_1703650	10318	TNIP1	392.166	218.915	0.00067066	-0.84109	Down
ILMN_2368773	10447	FAM3C	432.27	243.23	3.72659e-08	-0.82961	Down
ILMN_1765796	2026	ENO2	651.569	367.715	0.00584053	-0.82533	Down
ILMN_2186806	3134	HLA-F	784.366	444.684	1.78128e-05	-0.818745	Down
ILMN_1765258	3133	HLA-E	1108.55	633.158	1.65624e-29	-0.808038	Down
ILMN_1711069	51646	YPEL5	530.934	303.655	0.000328563	-0.8061	Down
ILMN_1903568			982.053	561.962	0.00494486	-0.805328	Down
ILMN_1679093	51545	ZNF581	476.129	272.64	2.08306e-05	-0.804358	Down
ILMN_1843198			677.548	388.055	0.000363814	-0.80406	Down
ILMN_1723846	25895	FAM119B	246.083	141.13	0.000134949	-0.802125	Down
ILMN_3259146	100129681	LOC100129681	246.132	142.849	1.47511e-05	-0.784938	Down
ILMN_1724658	664	BNIP3	2600.85	1534.85	0.000958567	-0.760889	Down
ILMN_2391765	50854	C6orf48	3855.75	2286.74	6.74402e-07	-0.753718	Down
ILMN_1737406	1316	KLF6	643.636	382.547	3.15561e-12	-0.750608	Down
ILMN_1665510	54206	ERRFI1	5584.83	3324.17	0.00248178	-0.748517	Down
ILMN_1730347	84317	CCDC115	223.988	136.712	0.00490646	-0.712284	Down
ILMN_1739001	4070	TACSTD2	613.475	374.616	0.000722006	-0.711592	Down
ILMN_1659936	23645	PPP1R15A	855.593	526.755	1.35695e-06	-0.699794	Down
ILMN_1672650	5315	PKM2	595.093	369.306	0.00308341	-0.688297	Down
ILMN_1752582	5869	RAB5B	906.283	564.068	0.00324068	-0.684093	Down
ILMN_1744963	30001	ERO1L	465.591	292.286	0.000556122	-0.671683	Down
ILMN_1708858	1454	CSNK1E	326.12	205.845	0.00939912	-0.663842	Down
ILMN_2085760	10095	ARPC1B	615.013	389.262	0.00580431	-0.659873	Down
ILMN_1757388	79629	OCEL1	200.996	127.411	0.00990361	-0.65768	Down
ILMN_2165753	649853	HLA-A29.1	1706.32	1088.26	0.00280445	-0.648863	Down
ILMN_2347349	57820	CCNB1IP1	648.995	413.973	9.22344e-05	-0.64867	Down
ILMN_1789702	2632	GBE1	406.868	260.632	3.16663e-06	-0.642546	Down
ILMN_1713369	23521	RPL13A	7177.14	4627.01	0.00289654	-0.633327	Down
ILMN_1685170	311	ANXA11	273.834	176.867	4.17587e-06	-0.630636	Down
ILMN_1764500	55845	C3orf10	632.224	410.759	0.00490646	-0.622143	Down
ILMN_3253456	64778	FNDC3B	521.959	340.224	0.000835686	-0.61745	Down
ILMN_1665235	10491	CRTAP	693.368	452.928	0.000279539	-0.614339	Down
ILMN_1740604	26056	RAB11FIP5	415.782	271.814	8.96724e-08	-0.613208	Down
ILMN_2207363	10567	RABAC1	738.889	484.099	2.27328e-08	-0.610055	Down
ILMN_1713668	7257	TSNAX	219.478	144.075	0.00139209	-0.60725	Down
ILMN_3277307	649553	LOC649553	215.258	141.307	0.00939912	-0.607239	Down
ILMN_1713759	51465	UBE2J1	267.317	177.845	0.00584372	-0.587935	Down
ILMN_2404135	8780	RIOK3	434.079	293.509	0.000406561	-0.564554	Down
ILMN_1771233	128866	CHMP4B	435.95	295.07	1.69009e-05	-0.563105	Down
ILMN_2108735	1917	EEF1A2	2012.36	1366.26	1.25853e-05	-0.558656	Down
ILMN_1810729	5412	UBL3	218.213	148.291	0.00890345	-0.557312	Down
ILMN_2260991	706	TSPO	827.064	564.26	4.97727e-05	-0.551638	Down
ILMN_1687538	2113	ETS1	1399.42	956.121	0.0036222	-0.549561	Down
ILMN_1724194	79716	NPEPL1	249.312	170.349	0.00106329	-0.549462	Down
ILMN_1675612	10904	BLCAP	205.701	140.837	0.00680369	-0.54652	Down
ILMN_2356654	3964	LGALS8	256.527	176.358	0.00406806	-0.5406	Down
ILMN_3288587	100131785	LOC100131785	1030.78	711.227	1.56646e-06	-0.53535	Down
ILMN_1667476	4055	LTBR	416.772	288.134	2.21546e-05	-0.532516	Down
ILMN_2382990	3098	HK1	2641.79	1834.76	0.000404958	-0.525924	Down
ILMN_1800354	1471	CST3	4167.56	2897.71	1.43639e-06	-0.524287	Down
ILMN_1734353	2879	GPX4	3011.53	2106.07	5.8992e-12	-0.515946	Down
ILMN_3266944	100129599	LOC100129599	626.659	442.298	8.29365e-08	-0.502663	Down
ILMN_1671260	79971	GPR177	355.819	251.531	7.11799e-05	-0.500408	Down
ILMN_1775327	5315	PKM2	780.669	551.962	1.9583e-06	-0.500141	Down
ILMN_1789809	644511	LOC644511	4694.15	3321.65	0.000414143	-0.498966	Down
ILMN_1703074	1362	CPD	423.27	300.087	0.00347524	-0.496197	Down
ILMN_1733305	83939	EIF2A	906.676	643.098	2.77384e-10	-0.495548	Down
ILMN_1876924	65125	WNK1	473.631	336.685	0.000116495	-0.492363	Down
ILMN_1675472	644799	LOC644799	906.097	645.011	0.0037751	-0.490342	Down
ILMN_2390299	5696	PSMB8	713.416	508.031	3.90145e-05	-0.489826	Down
ILMN_1742450	6892	TAPBP	569.558	406.239	1.92638e-07	-0.487512	Down
ILMN_3283772	644237	LOC644237	1432.71	1022.54	2.59783e-05	-0.48659	Down
ILMN_1729509	25912	C1orf43	660.365	471.587	1.25853e-05	-0.485739	Down
ILMN_1744604	1535	CYBA	2849.21	2038.32	0.00113121	-0.483181	Down
ILMN_1762747	6138	RPL15	3933.17	2814.33	0.000404155	-0.482902	Down
ILMN_3241469	100134537	LOC100134537	661.938	474.128	0.000230808	-0.48142	Down
ILMN_1698243	112770	C1orf85	454.644	326.578	0.00482042	-0.47731	Down
ILMN_2203950	3105	HLA-A	7271	5251.51	1.25853e-05	-0.469423	Down
ILMN_3226291	728820	LOC728820	1487.73	1076.37	4.98332e-07	-0.466937	Down
ILMN_1731287	26286	ARFGAP3	324.457	234.753	0.00621627	-0.466883	Down
ILMN_1773576	8895	CPNE3	756.76	549.178	0.000608657	-0.462562	Down
ILMN_1709674	9945	GFPT2	788.465	576.908	0.0054491	-0.450704	Down
ILMN_1713892	201895	C4orf34	617.153	453.919	0.00066599	-0.443192	Down
ILMN_1706434	440359	LOC440359	878.312	646.448	0.00448616	-0.442198	Down
ILMN_1736597	7086	TKT	1323.54	975.556	0.00419405	-0.440107	Down
ILMN_1666444	5937	RBMS1	660.243	487.869	2.21546e-05	-0.436503	Down
ILMN_1807423	10643	IGF2BP3	792.946	586.646	0.00939912	-0.434732	Down
ILMN_1765459	6284	S100A13	898.071	664.89	0.00530929	-0.433715	Down
ILMN_1671583	23608	MKRN1	711.866	527.604	1.22815e-06	-0.432151	Down
ILMN_1813091	400	ARL1	380.853	282.505	0.00500559	-0.430956	Down
ILMN_1791296	23333	DPY19L1	1906.29	1414.37	0.00746606	-0.430612	Down
ILMN_1741148	226	ALDOA	2646.65	1969.97	3.09013e-05	-0.425993	Down
ILMN_2143795	112597	MGC4677	3808.25	2856.74	0.00115199	-0.414756	Down
ILMN_1811489	9943	OXSR1	644.175	483.631	0.00955743	-0.413546	Down
ILMN_1685397	3675	ITGA3	1457.82	1096.16	0.00219905	-0.411351	Down
ILMN_1673944	63905	MANBAL	929.318	700.523	0.00228218	-0.40774	Down
ILMN_2258774	84545	MRPL43	942.135	711.244	6.08263e-05	-0.405589	Down
ILMN_1781580	25798	BRI3	777.255	588.959	0.00136511	-0.40022	Down
ILMN_2307740	4179	CD46	571.319	433.047	0.000369265	-0.399773	Down
ILMN_3251472	9804	TOMM20	2526.18	1918.88	0.00746606	-0.396695	Down
ILMN_1688753	9791	PTDSS1	706.931	539.753	0.00413734	-0.38927	Down
ILMN_1695000	24144	TFIP11	380.61	291.206	0.00342497	-0.386271	Down
ILMN_1739847	8664	EIF3D	2479.16	1897.64	0.00010054	-0.385645	Down
ILMN_1744517	2799	GNS	1729.07	1327.64	0.00360195	-0.381137	Down
ILMN_1710482	334	APLP2	624.542	479.658	0.000360525	-0.380792	Down
ILMN_1728907	9522	SCAMP1	708.003	548.575	0.00109357	-0.368067	Down
ILMN_1808041	4736	RPL10A	4238.17	3305.35	0.000253537	-0.358638	Down
ILMN_1778374	682	BSG	2020.97	1576.82	0.000200138	-0.358029	Down
ILMN_1746396	1499	CTNNB1	707.545	554.527	0.00228218	-0.351565	Down
ILMN_2378952	2879	GPX4	4114.99	3228.97	0.00341433	-0.349812	Down
ILMN_1703791	310	ANXA7	1269.78	999.407	0.00515158	-0.345436	Down
ILMN_1738103	11316	COPE	1009.28	794.869	0.000669871	-0.344543	Down
ILMN_2366634	5315	PKM2	1463.47	1157.54	0.000302328	-0.338337	Down
ILMN_1676765	390354	LOC390354	4863.94	3862.74	4.12341e-05	-0.332498	Down
ILMN_1684385	9276	COPB2	633.221	505.529	0.00807643	-0.324916	Down
ILMN_1652754	126299	ZNF428	1651.32	1320.05	0.00280445	-0.323031	Down
ILMN_1652955	648622	LOC648622	3230.59	2598.83	0.000155358	-0.313936	Down
ILMN_1707339	10950	BTG3	786.576	633.25	0.00751811	-0.312811	Down
ILMN_1808202	91300	C19orf22	1102.11	890.387	0.00358762	-0.307759	Down
ILMN_1343295	2597	GAPDH	10425.6	8686.27	0.00751811	-0.263317	Down
ILMN_1699015	3020	H3F3A	5055.87	5702.8	3.48094e-33	0.173712	Up
ILMN_2321451	3184	HNRNPD	3840.39	4772.73	0.00494486	0.313563	Up
ILMN_1754795	2195	FAT1	726.467	919.422	0.00890345	0.33983	Up
ILMN_1762436	7314	UBB	7898.12	10006.8	0.00545328	0.341403	Up
ILMN_2041046	1163	CKS1B	1030.44	1307.24	0.00419405	0.343269	Up
ILMN_1748819	29093	MRPL22	766.339	977.426	0.00713759	0.351005	Up
ILMN_1678143	397	ARHGDIB	5204.61	6649.27	0.00499808	0.353405	Up
ILMN_1751368	3184	HNRNPD	3796.27	4871.27	0.000865265	0.359716	Up
ILMN_1794522	1984	EIF5A	1345.01	1735.18	0.00172962	0.367469	Up
ILMN_2168449	1665	DHX15	1905.31	2470.42	0.00637241	0.374733	Up
ILMN_2201533	254863	C17orf61	1746.58	2266.46	0.00199253	0.375905	Up
ILMN_2066020	6921	TCEB1	1322.15	1717.12	0.00177033	0.377097	Up
ILMN_2050617	643253	CCT6P1	570.004	743.378	0.00746606	0.383124	Up
ILMN_1880406			1028.9	1350.29	0.00717731	0.392172	Up
ILMN_1758674	83460	TMEM93	1223.26	1609.07	0.0013812	0.39549	Up
ILMN_1678300	146880	MGC40489	384.471	506.713	0.00719658	0.398296	Up
ILMN_2395043	3308	HSPA4	656.984	866.847	0.00976354	0.39992	Up
ILMN_2343010	388962	BOLA3	1503.5	1983.86	0.00016185	0.399989	Up
ILMN_1695645	1069	CETN2	1106.38	1465.57	0.000223939	0.405606	Up
ILMN_3304111	729978	LOC729978	1319.94	1749.01	0.00175907	0.406071	Up
ILMN_1690802	51504	TRMT112	2747.09	3641.25	0.0036222	0.40653	Up
ILMN_1782247	2648	KAT2A	479.976	636.979	0.0018471	0.408283	Up
ILMN_2310621	9551	ATP5J2	1608.9	2137.47	0.00599705	0.409834	Up
ILMN_1741957	10244	RABEPK	567.241	753.611	0.00248178	0.409858	Up
ILMN_1707858	3015	H2AFZ	6722.77	9009.31	0.00100099	0.422361	Up
ILMN_1744147	10153	CEBPZ	610.041	818.009	0.00254648	0.423209	Up
ILMN_1664931	2961	GTF2E2	786.459	1055.47	0.00401248	0.424438	Up
ILMN_3251341	84790	TUBA1C	5773.13	7759.88	0.000123781	0.42668	Up
ILMN_1671839	9013	TAF1C	578.215	777.264	0.00249996	0.426798	Up
ILMN_1666178	90313	TP53I13	574.346	773.237	0.000971249	0.428991	Up
ILMN_1695731	7283	TUBG1	993.038	1339.08	0.00173413	0.431319	Up
ILMN_3209117	644214	LOC644214	323.522	437.519	0.00341433	0.435482	Up
ILMN_1802973	29945	ANAPC4	330.956	447.784	0.00691879	0.436164	Up
ILMN_1779163	28971	C11orf67	447.766	608.227	0.000666049	0.441867	Up
ILMN_3236713	23642	SNHG1	964.329	1313.05	0.000114242	0.445325	Up
ILMN_1748770	9793	CKAP5	1034.27	1409.81	0.00746606	0.446894	Up
ILMN_1684929	11073	TOPBP1	241.233	333.286	0.00719658	0.466329	Up
ILMN_1691097	3320	HSP90AA1	3228.36	4461.87	0.00100099	0.466845	Up
ILMN_3236945	114971	PTPMT1	784.703	1088.59	0.000200138	0.472238	Up
ILMN_1657547	91057	CCDC34	537.173	745.406	0.00317497	0.472639	Up
ILMN_1786065	29128	UHRF1	1053.3	1464.41	0.00874454	0.475404	Up
ILMN_1658678	113174	SAAL1	452.538	635.366	0.00100099	0.489551	Up
ILMN_2042771	9232	PTTG1	2502.78	3521.31	0.00737157	0.49258	Up
ILMN_2369682	3181	HNRPA2B1	3318.38	4676.57	0.000123781	0.49497	Up
ILMN_1708936	51010	EXOSC3	610.809	861.416	0.00751811	0.495988	Up
ILMN_1798654	4175	MCM6	883.933	1249.41	0.00751811	0.499234	Up
ILMN_1747911	983	CDC2	805.826	1142.47	4.21072e-06	0.503619	Up
ILMN_1662198	5905	RANGAP1	1131.3	1605.73	7.74323e-05	0.50525	Up
ILMN_3256004	100130003	LOC100130003	3155	4486.4	0.000828561	0.50792	Up
ILMN_1764764	84939	MUM1	262.216	373.759	0.0020579	0.511353	Up
ILMN_1663195	4176	MCM7	2868.19	4090.2	0.00341433	0.512028	Up
ILMN_1781419	51501	C11orf73	273.071	389.67	0.00119819	0.512975	Up
ILMN_1718069	79003	MIS12	514.584	740.527	0.0020579	0.525146	Up
ILMN_1747303	10212	DDX39	985.382	1422.23	0.00746606	0.529398	Up
ILMN_1737298	4144	MAT2A	2135.25	3084.28	1.35695e-06	0.530527	Up
ILMN_2221564	55646	LYAR	422.381	612.258	0.00144738	0.535596	Up
ILMN_1784352	83605	CCM2	517.533	750.298	0.00126969	0.535813	Up
ILMN_2202481	134510	UBLCP1	249.854	363.393	0.00139209	0.540447	Up
ILMN_1673936	8570	KHSRP	598.184	871.813	0.00887031	0.543429	Up
ILMN_1772743	10026	PIGK	388.334	573.759	5.28541e-06	0.563147	Up
ILMN_2045729	55759	WDR12	265.515	393.988	0.00363232	0.569362	Up
ILMN_3226613	729686	LOC729686	249.76	370.755	0.000272244	0.56992	Up
ILMN_1683562	6637	SNRPG	4757.53	7088.44	3.72311e-09	0.575255	Up
ILMN_1785852	64859	OBFC2A	330.079	494.3	0.00294296	0.582575	Up
ILMN_1804851	51373	MRPS17	750.534	1135.4	0.00102111	0.597209	Up
ILMN_2366790	11056	DDX52	193.181	292.487	0.00126969	0.598414	Up
ILMN_1681754	8836	GGH	285.274	431.988	0.000558387	0.598639	Up
ILMN_1685413	79053	ALG8	504.834	765.45	1.28493e-06	0.6005	Up
ILMN_1810228	8458	TTF2	392.068	595.767	0.000123781	0.603642	Up
ILMN_3279219	100132457	LOC100132457	1024.71	1560.47	0.000593833	0.606756	Up
ILMN_2373515	3320	HSP90AA1	5914.7	9095.77	0.000406561	0.62089	Up
ILMN_2413650	6491	STIL	178.892	278.703	0.00905773	0.639645	Up
ILMN_1716862	5495	PPM1B	173.478	270.608	0.00988773	0.641446	Up
ILMN_1770053	5931	RBBP7	260.572	408.289	4.15467e-06	0.647909	Up
ILMN_2151368	79159	NOL12	120	189.904	0.00717731	0.662234	Up
ILMN_1730631	80304	C2orf44	171.365	272.226	0.00115199	0.667729	Up
ILMN_1753249	1662	DDX10	365.792	581.878	0.0094905	0.669691	Up
ILMN_1690114	401494	PTPLAD2	159.077	253.666	0.0056466	0.673203	Up
ILMN_1737205	4173	MCM4	692.296	1104.8	0.00719658	0.674322	Up
ILMN_1707484	79833	GEMIN6	339.009	544.36	1.26034e-06	0.683237	Up
ILMN_1734194	51010	EXOSC3	252.811	407.66	0.00939912	0.689306	Up
ILMN_1684289	55163	PNPO	703.425	1135.22	6.08263e-05	0.690508	Up
ILMN_1712803	891	CCNB1	130.886	211.283	0.0095188	0.690862	Up
ILMN_1678904	2027	ENO3	185.806	303.18	0.00483712	0.706379	Up
ILMN_1755862	5198	PFAS	266.724	435.923	0.00368436	0.708725	Up
ILMN_1856315			170.364	279.263	0.000428426	0.713004	Up
ILMN_1796417	440	ASNS	724.807	1198.59	0.00157307	0.725663	Up
ILMN_2410038	63901	FAM111A	559.424	926.994	2.09915e-06	0.728617	Up
ILMN_2413898	55388	MCM10	148.016	245.799	0.00147302	0.731728	Up
ILMN_1737184	83879	CDCA7	740.859	1246.22	5.78635e-06	0.750282	Up
ILMN_1749930	55706	TMEM48	111.273	188.469	0.00427961	0.760215	Up
ILMN_1808938	5281	PIGF	166.325	287.161	1.24503e-05	0.787856	Up
ILMN_1844593			121.041	216.285	0.000354185	0.837436	Up
ILMN_1809590	51659	GINS2	339.624	613.548	0.00147135	0.853239	Up
ILMN_2358980	3611	ILK	92.4318	168.285	0.00139209	0.864442	Up
ILMN_3303612	80336	PABPC1L	374.254	683.766	7.61785e-10	0.869486	Up
ILMN_1790100	220042	C11orf82	98.5073	181.279	0.000710427	0.879911	Up
ILMN_2371700	55559	UCHL5IP	165.288	309.145	5.55974e-06	0.903304	Up
ILMN_1658494	28984	C13orf15	292.794	567.916	0.00501567	0.955791	Up
ILMN_2241627	9947	MAGEC1	121.931	236.767	0.000414143	0.957401	Up
ILMN_1776337	26973	CHORDC1	76.5588	150.248	0.00821368	0.97271	Up
ILMN_1805148	130162	C2orf63	99.1031	201.424	5.98579e-05	1.02323	Up
ILMN_1680874	347733	TUBB2B	123.245	269.491	0.000179827	1.12871	Up
ILMN_2187727	64318	NOC3L	185.866	411.571	8.45366e-10	1.14688	Up
ILMN_2342695	5154	PDGFA	79.7639	209.978	0.000173746	1.39643	Up
ILMN_1716264	27063	ANKRD1	73.5978	194.231	3.5352e-05	1.40004	Up
