# Supplementary material for: A New Mouse Model for the Study of Human Breast Cancer Metastasis
Source: PLoS One. 2012 Oct 31;7(10):e47995. doi: 10.1371/journal.pone.0047995 (PMC3485320; doi:10.1371/journal.pone.0047995)
Supplement: Table S9 — Venn diagram of genes differentially expressed in MDA-MB-231 and MDA-MB-436 lymph node metastases compared to primary mammary fat pad tumors. 6 probes are differentially expressed in both lymph node metastases compared to their respective primary mammary fat pad tumors. (XLSX) [file pone.0047995.s009.xlsx]

## Sheet: Table S9
Summary
Experiment	Illumina Microarray
Species	Human
Analysis software	Genome Studio v2011.1
Analysis module	Gene Expression v1.9
Normalization	Quantile
Background subtraction	Yes
Error model	Illumina custom with Benjamini-Hochberg FDR correction
Content Descriptor	HumanHT-12_V4_0_R2_15002873_B.bgx
Genome build	RefSeq Rel 38
Detection pvalue filter	0.05
Differential pvalue filter	0.01
Column descriptions
ProbeID	Illumina probe identifier
GeneID	Entrez gene identifier
Symbol	Official gene symbol
Group1_Signal	Average signal for samples in Group 1
Group2_Signal	Average signal for samples in Group 2
FDR corrected DiffPval	FDR corrected pvalue for differential expression call
log2FoldChange	log2(Group2_Signal/Group1_Signal)
Regulation	Up if log2FoldChange is positive, Down if log2FoldChange is negative
Group 1
MDA231/MDA436 lymph node DEG Venn diagram
Article title: A new mouse model for the study of human breast cancer metastasis.
Journal: PLOS ONE
Authors:Elizabeth Iorns, Katherine Drews-Elger, Toby M. Ward, Sonja Dean, Jennifer Clarke, Deborah Berry, Dorraya El Ashry and Marc Lippman
Affiliation: University of Miami Miller School of Medicine, Miami, FL, 33136, USA
Corresponding author email address: mlippman@med.miami.edu
Table S9
Venn diagram of genes differentially expressed in MDA-MB-231 and MDA-MB-436 lymph node metastases compared to primary mammary fat pad tumors. 6 probes are differentially expressed in both lymph node metastases compared to their respective primary mammary fat pad tumors.
ProbeID	GeneID	Symbol	Regulation
ILMN_1713369	23521	RPL13A	Down
ILMN_1737406	1316	KLF6	Down
ILMN_3266944	100129599	LOC100129599	Down
ILMN_1789702	2632	GBE1	Down
ILMN_2342695	5154	PDGFA	Up
ILMN_1786065	29128	UHRF1	Up
