# Supplementary material for: A New Mouse Model for the Study of Human Breast Cancer Metastasis
Source: PLoS One. 2012 Oct 31;7(10):e47995. doi: 10.1371/journal.pone.0047995 (PMC3485320; doi:10.1371/journal.pone.0047995)
Supplement: Table S10 — Venn diagram of genes differentially expressed in MDA-MB-231 and MDA-MB-436 lung metastases compared to primary mammary fat pad tumors. 17 probes are differentially expressed in both lung metastases compared to their respective primary mammary fat pad tumors. (XLSX) [file pone.0047995.s010.xlsx]

## Sheet: Table S10
Summary
Experiment	Illumina Microarray
Species	Human
Analysis software	Genome Studio v2011.1
Analysis module	Gene Expression v1.9
Normalization	Quantile
Background subtraction	Yes
Error model	Illumina custom with Benjamini-Hochberg FDR correction
Content Descriptor	HumanHT-12_V4_0_R2_15002873_B.bgx
Genome build	RefSeq Rel 38
Detection pvalue filter	0.05
Differential pvalue filter	0.01
Column descriptions
ProbeID	Illumina probe identifier
GeneID	Entrez gene identifier
Symbol	Official gene symbol
Group1_Signal	Average signal for samples in Group 1
Group2_Signal	Average signal for samples in Group 2
FDR corrected DiffPval	FDR corrected pvalue for differential expression call
log2FoldChange	log2(Group2_Signal/Group1_Signal)
Regulation	Up if log2FoldChange is positive, Down if log2FoldChange is negative
Group 1
MDA231/MDA436 lung DEG Venn diagram
Article title: A new mouse model for the study of human breast cancer metastasis.
Journal: PLOS ONE
Authors:Elizabeth Iorns, Katherine Drews-Elger, Toby M. Ward, Sonja Dean, Jennifer Clarke, Deborah Berry, Dorraya El Ashry and Marc Lippman
Affiliation: University of Miami Miller School of Medicine, Miami, FL, 33136, USA
Corresponding author email address: mlippman@med.miami.edu
Table S10
Venn diagram of genes differentially expressed in MDA-MB-231 and MDA-MB-436 lung metastases compared to primary mammary fat pad tumors. 17 probes are differentially expressed in both lung metastases compared to their respective primary mammary fat pad tumors.
ProbeID	GeneID	Symbol	Regulation
ILMN_1658802	200185	KRTCAP2	Down
ILMN_1726245	7048	TGFBR2	Down
ILMN_3198247	388707	LOC388707	Down
ILMN_3225591	144581	RPL14L	Down
ILMN_1736597	7086	TKT	Down
ILMN_1691104	441531	PGAM4	Down
ILMN_3219764	441506	LOC441506	Down
ILMN_2384241	7048	TGFBR2	Down
ILMN_2382990	3098	HK1	Down
ILMN_1661599	54541	DDIT4	Down
ILMN_1713369	23521	RPL13A	Down
ILMN_1656057	5328	PLAU	Down
ILMN_1751726	649049	LOC649049	Down
ILMN_2368713	387522	TMEM189-UBE2V1	Down
ILMN_1787410	3692	EIF6	Down
ILMN_3211132	645173	LOC645173	Down
ILMN_3219643	401537	LOC401537	Down
